# Supplementary material
Source: ML conference proceedings conference paper supplement (https://openreview.net/forum?id=_Qwp7ATIa6P)

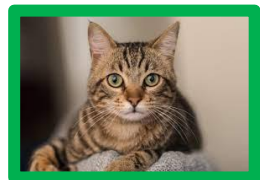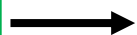

UQ Deep  
Model

→  $\mu(\mathbb{P}(y = Cat)) = 0.95$   
→  $\sigma^2(\mathbb{P}(y = Cat)) = 0.01$

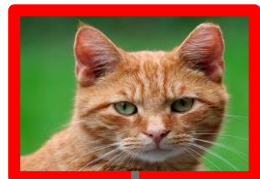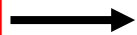

UQ Deep  
Model

→  $\mu(\mathbb{P}(y = Cat)) = 0.46$   
→  $\sigma^2(\mathbb{P}(y = Cat)) = 0.20$

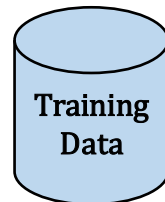

Training  
Data

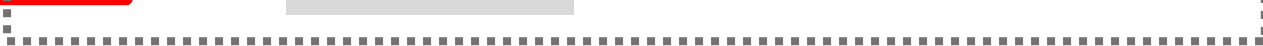

Supplement: supplementary_material [file attachment]
