# Supplementary material
Source: ML conference proceedings conference paper supplement (https://openreview.net/forum?id=_Qwp7ATIa6P)

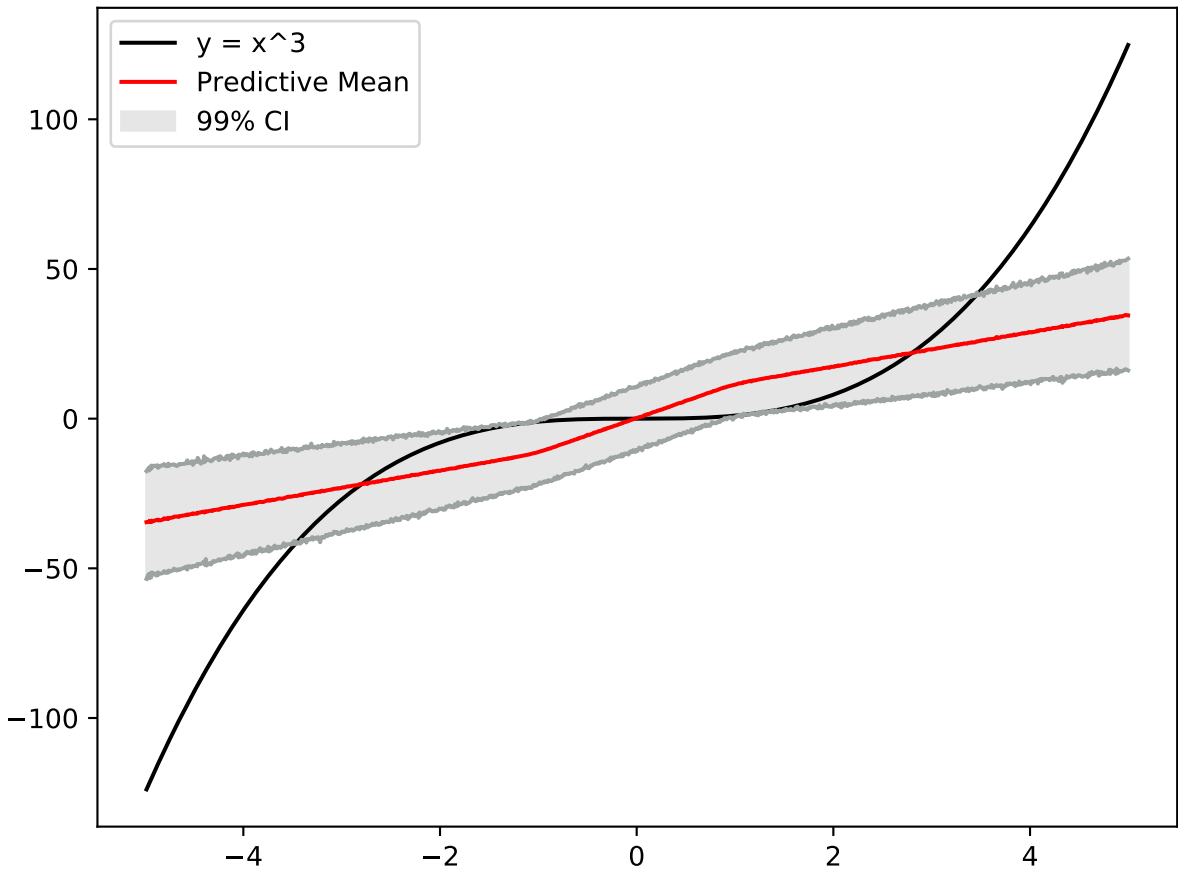

Supplement: supplementary_material [file attachment]

Test with Kurtosis = 1.50

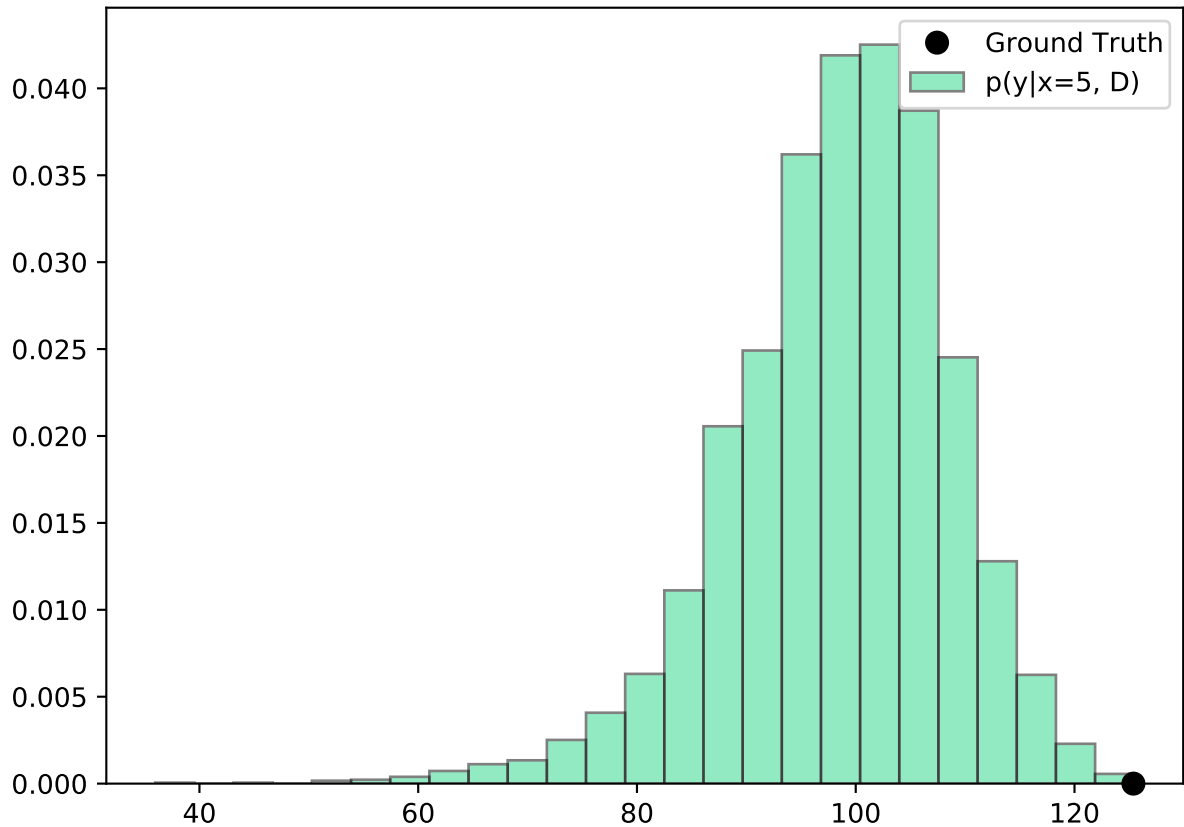

Supplement: supplementary_material [file attachment]

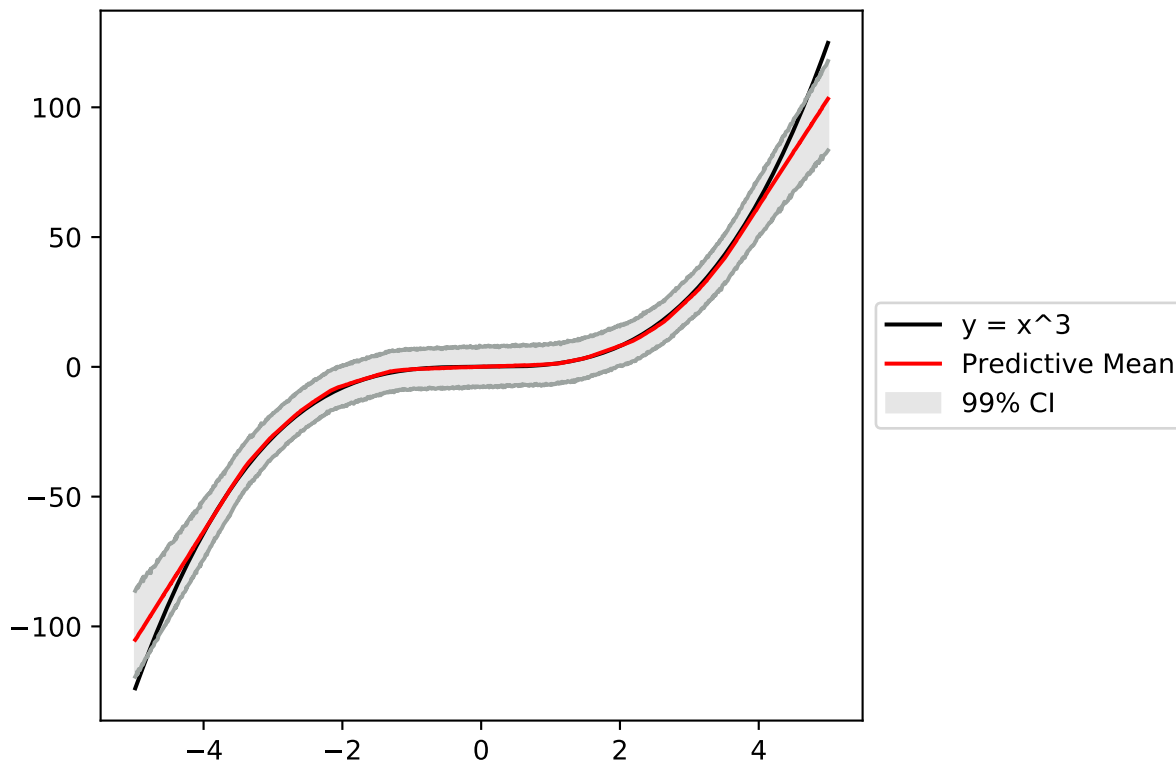

Supplement: supplementary_material [file attachment]

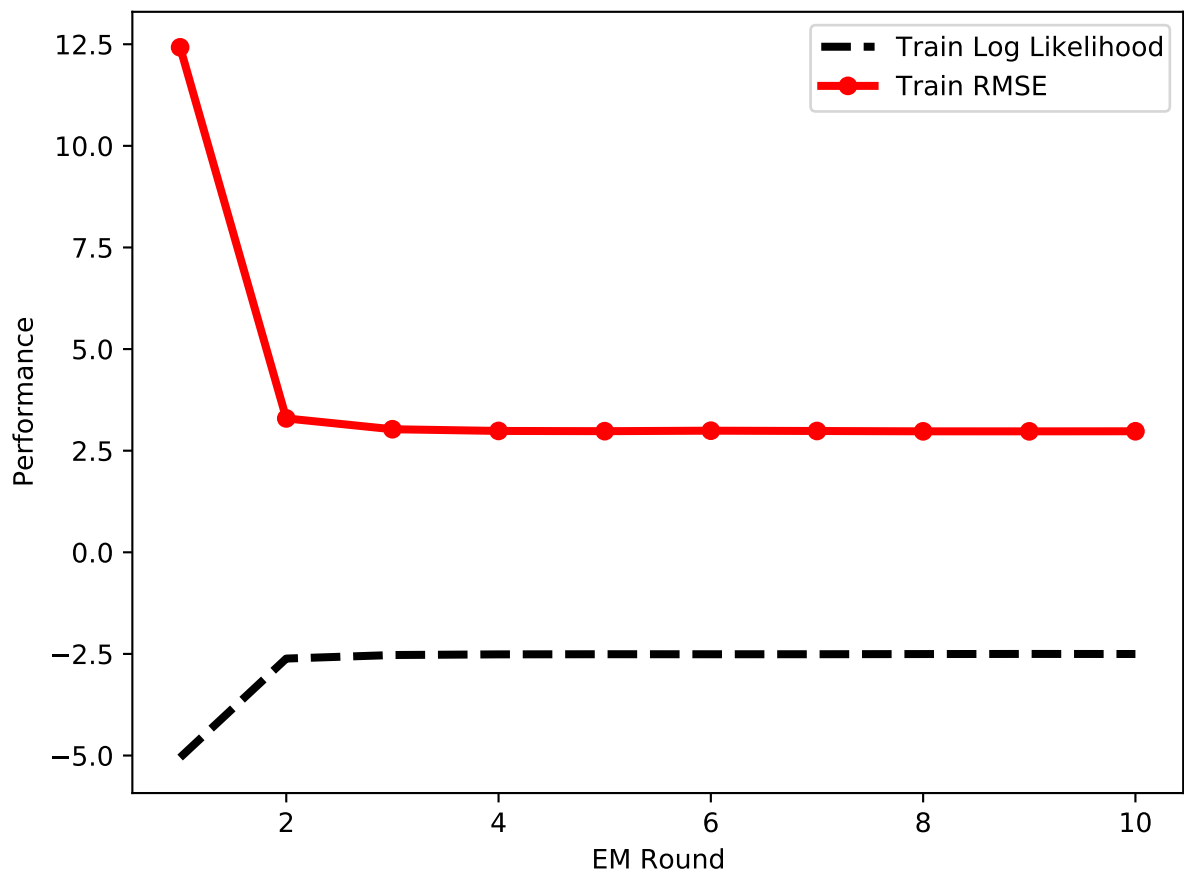

Supplement: supplementary_material [file attachment]

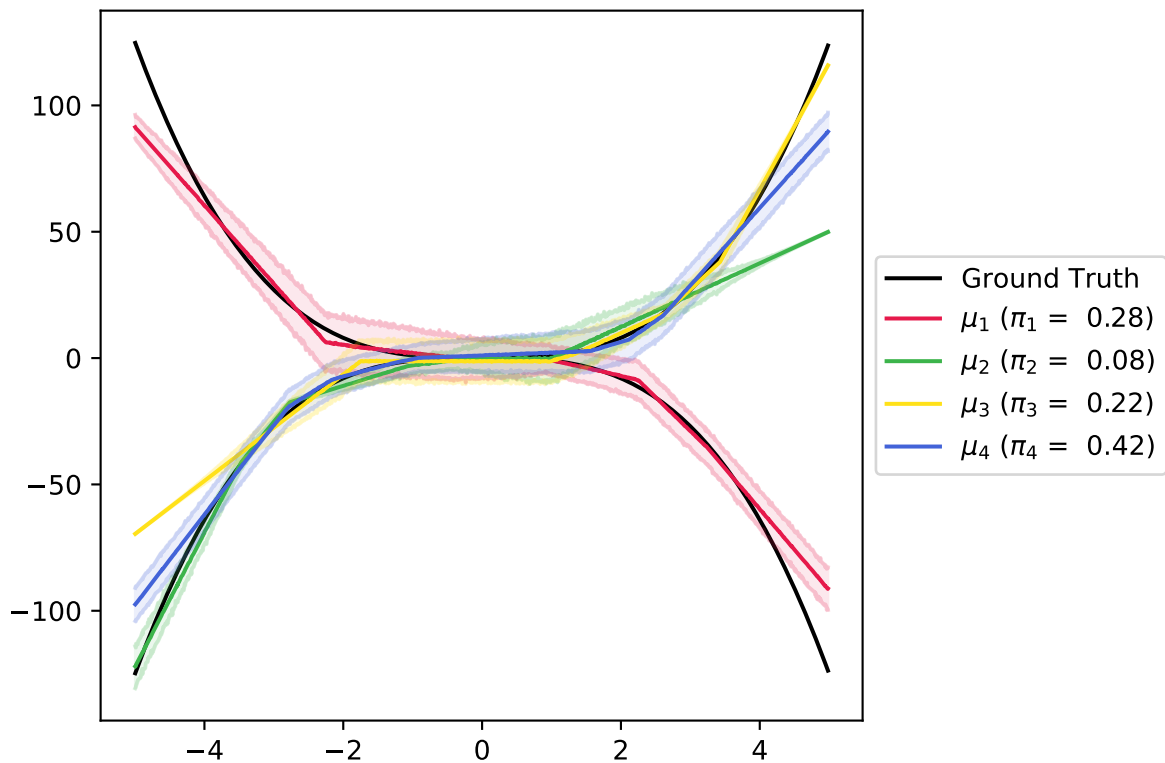

Supplement: supplementary_material [file attachment]

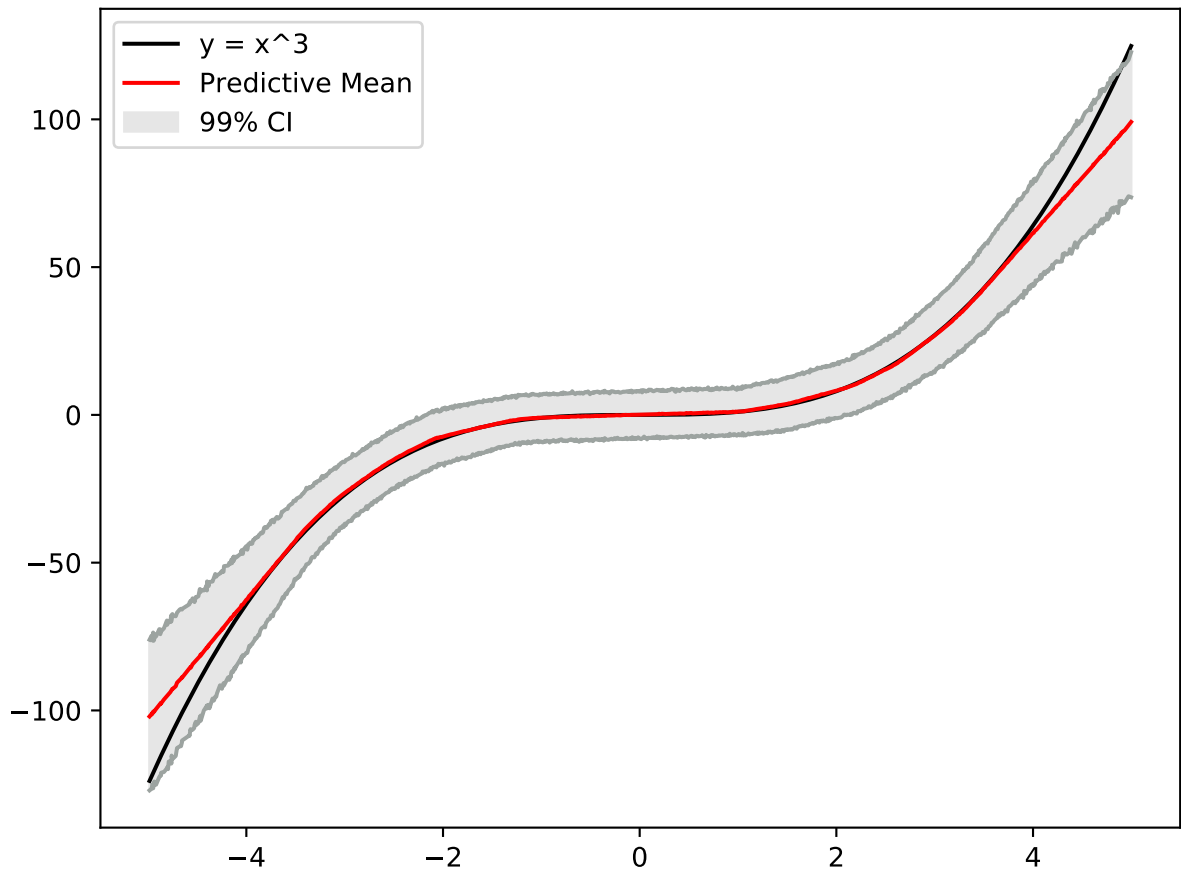

Supplement: supplementary_material [file attachment]

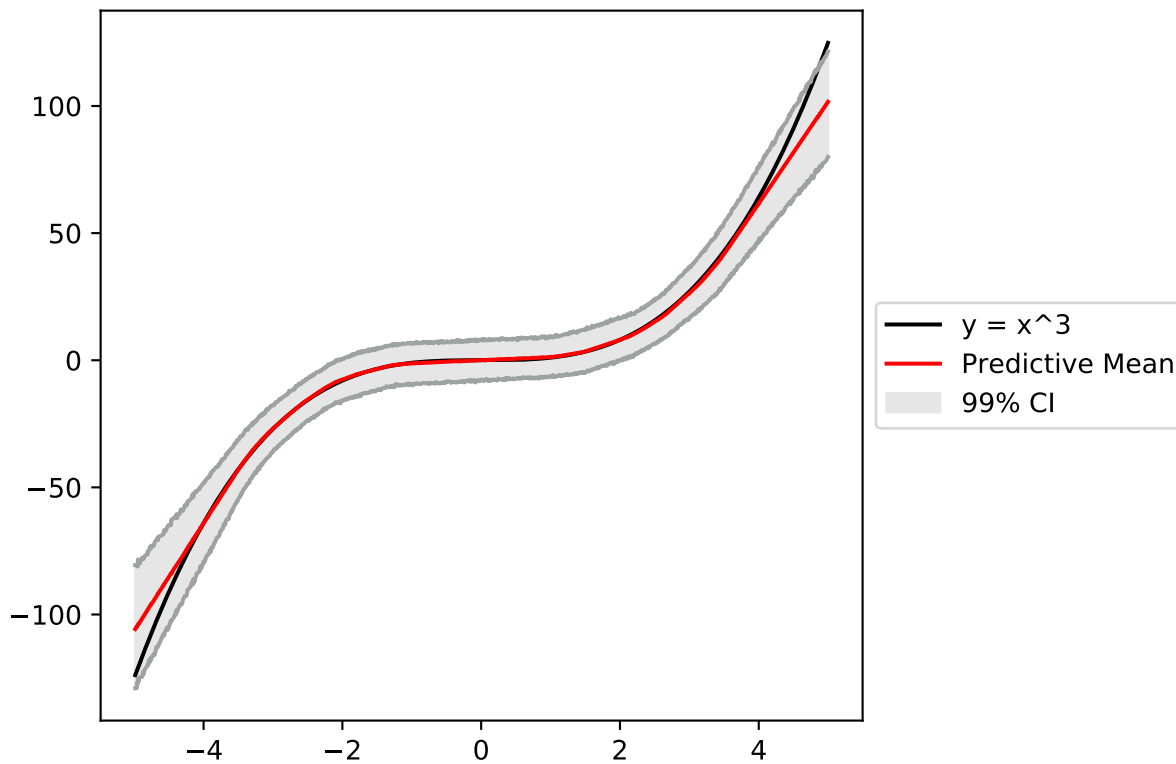

Supplement: supplementary_material [file attachment]

Test with Kurtosis = 0.07

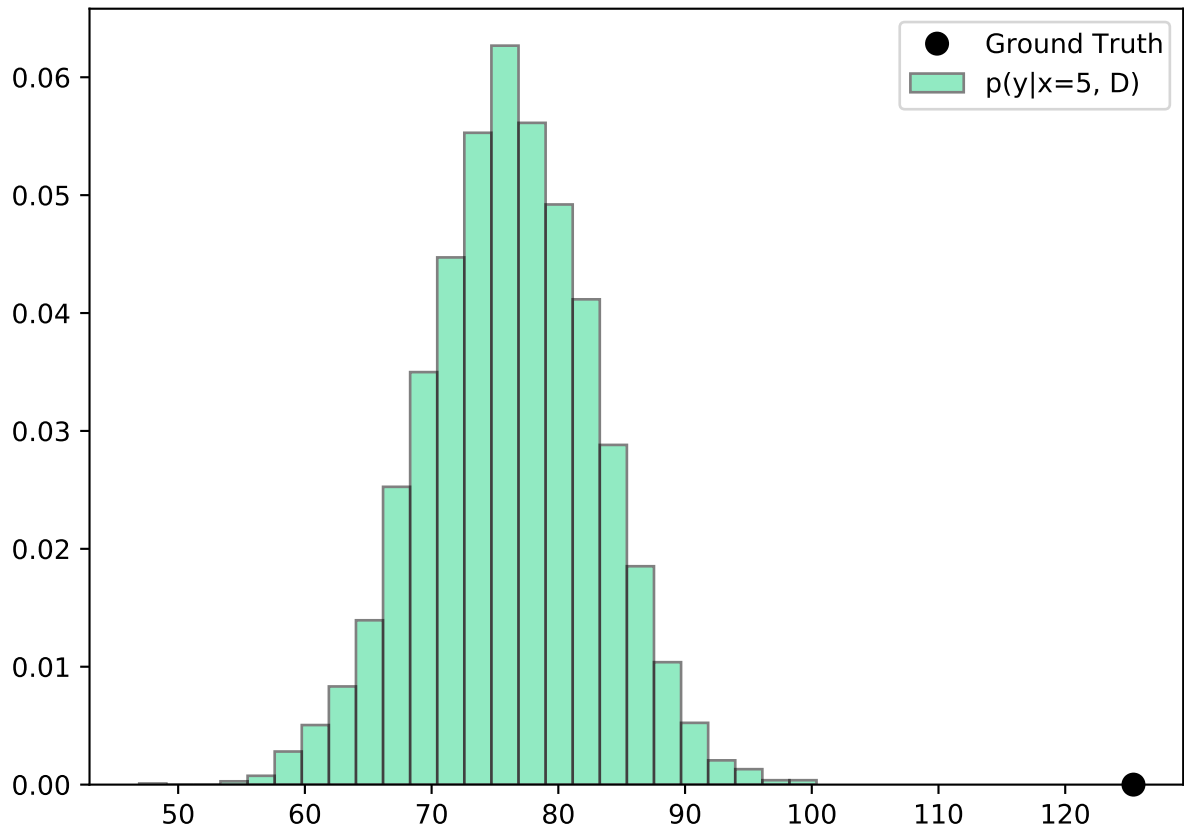

Supplement: supplementary_material [file attachment]

Train\_1 with Kurtosis = 4.08

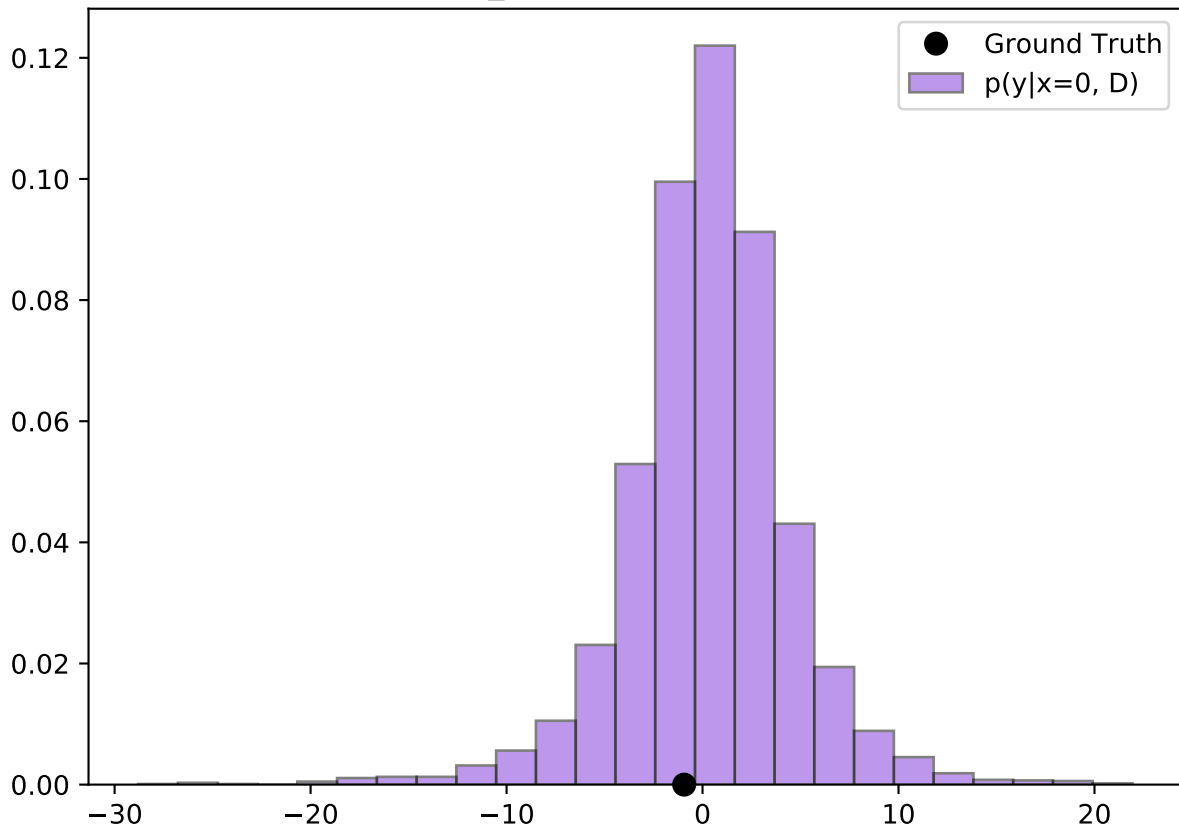

Supplement: supplementary_material [file attachment]

Train\_1 with Kurtosis = 0.09

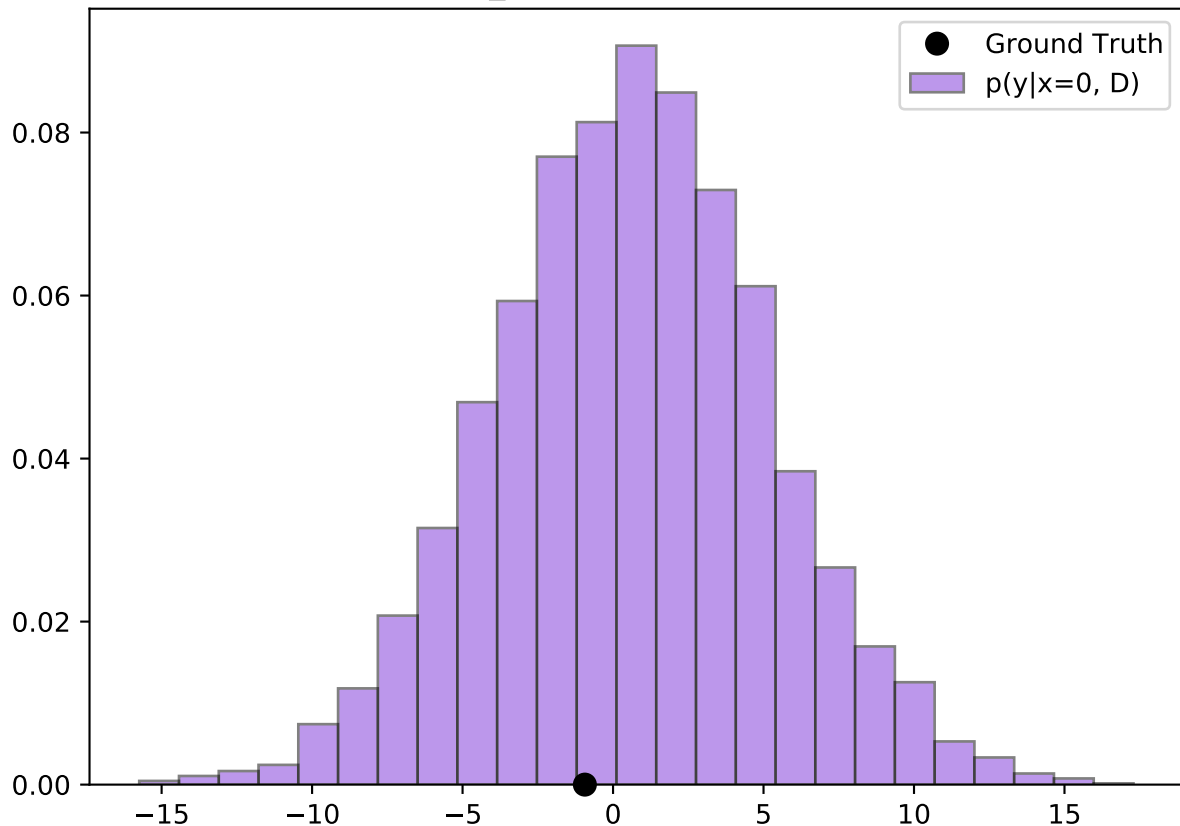

Supplement: supplementary_material [file attachment]

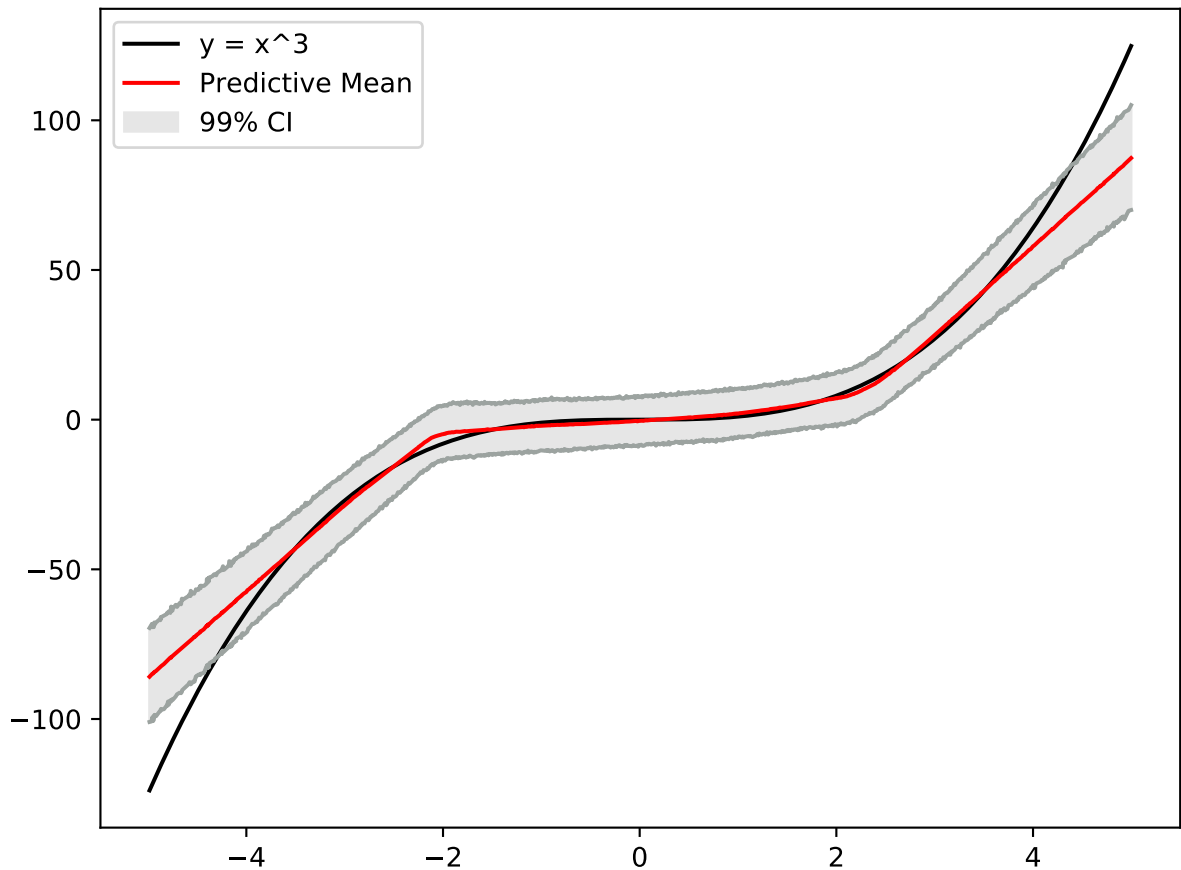

Supplement: supplementary_material [file attachment]

Test with Kurtosis = 0.12

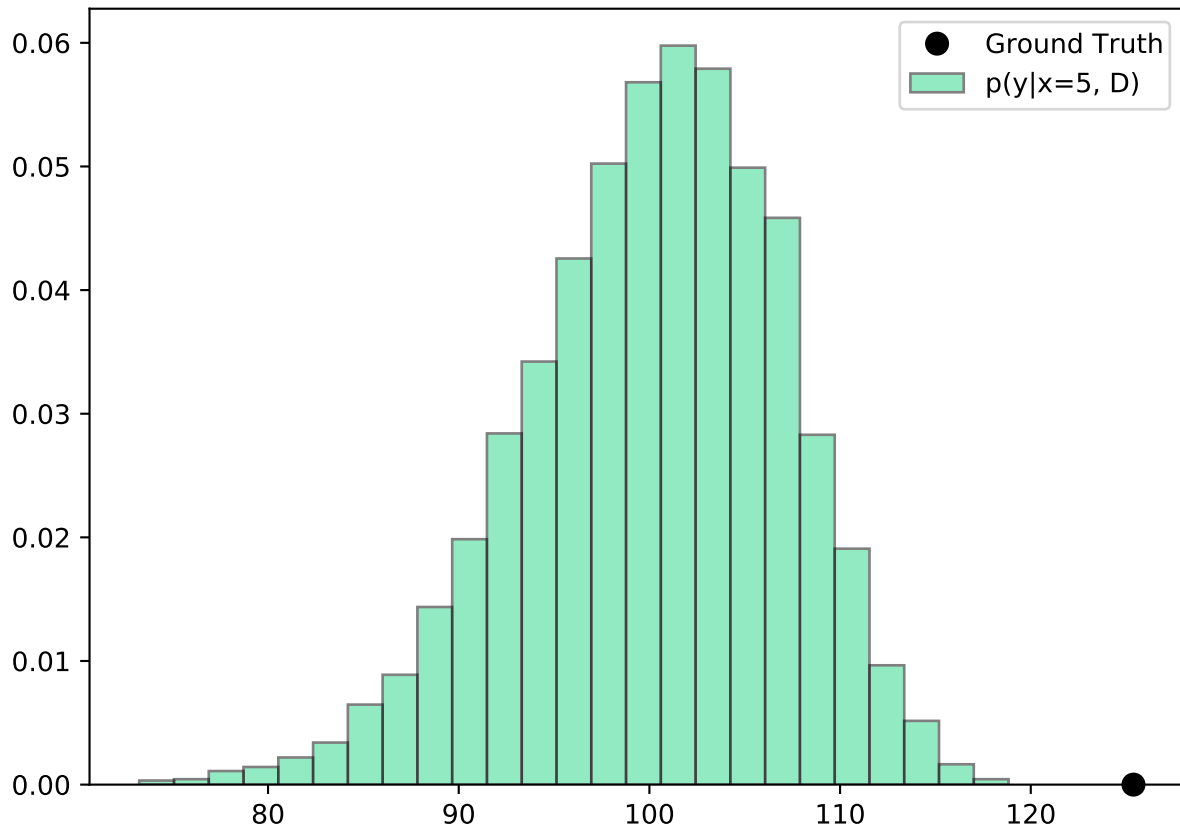

Supplement: supplementary_material [file attachment]

Train\_2 with Kurtosis = -1.17

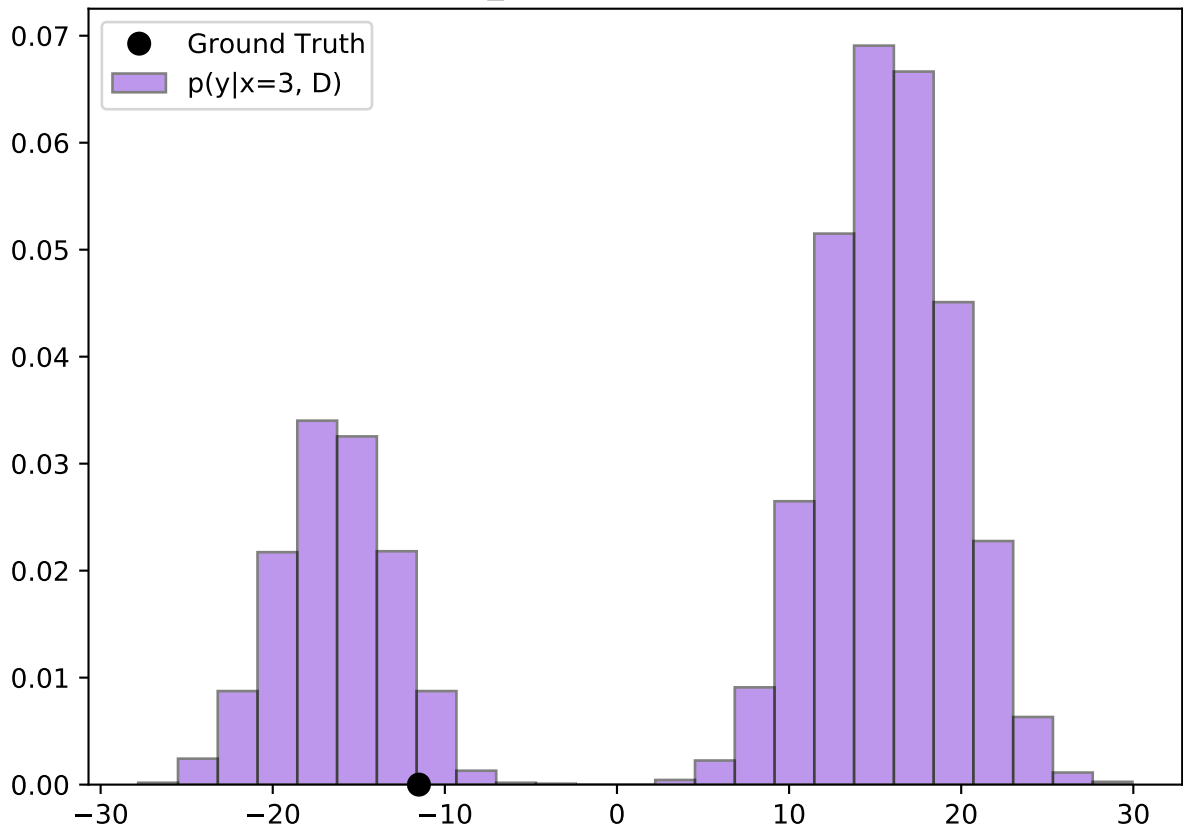

Supplement: supplementary_material [file attachment]

Train\_2 with Kurtosis = -1.02

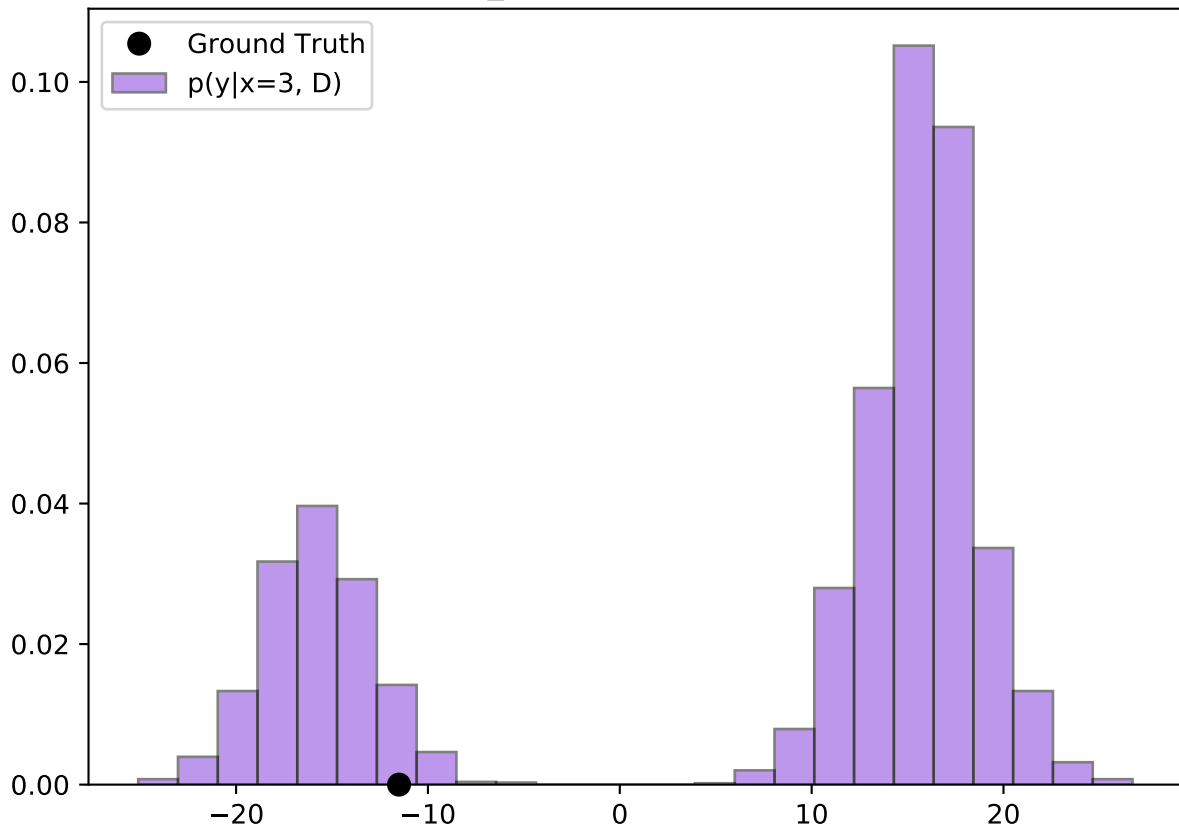

Supplement: supplementary_material [file attachment]

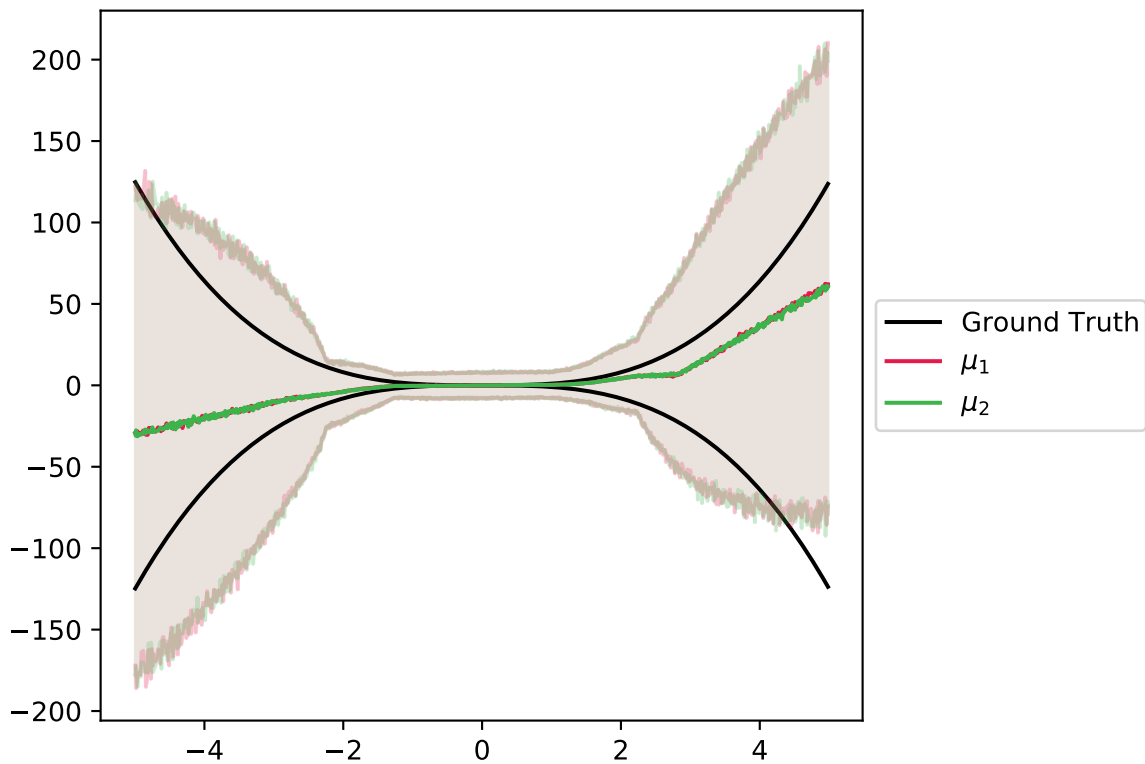

Supplement: supplementary_material [file attachment]

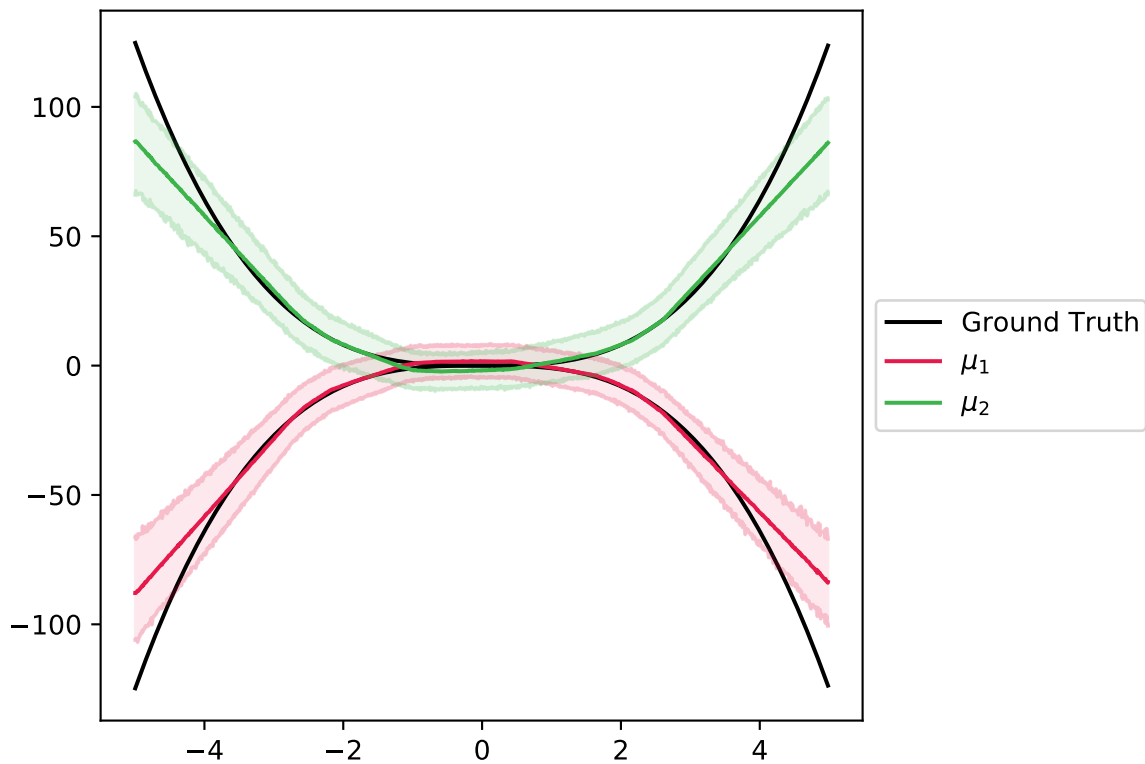

Supplement: supplementary_material [file attachment]

Train\_2 with Kurtosis = -1.02

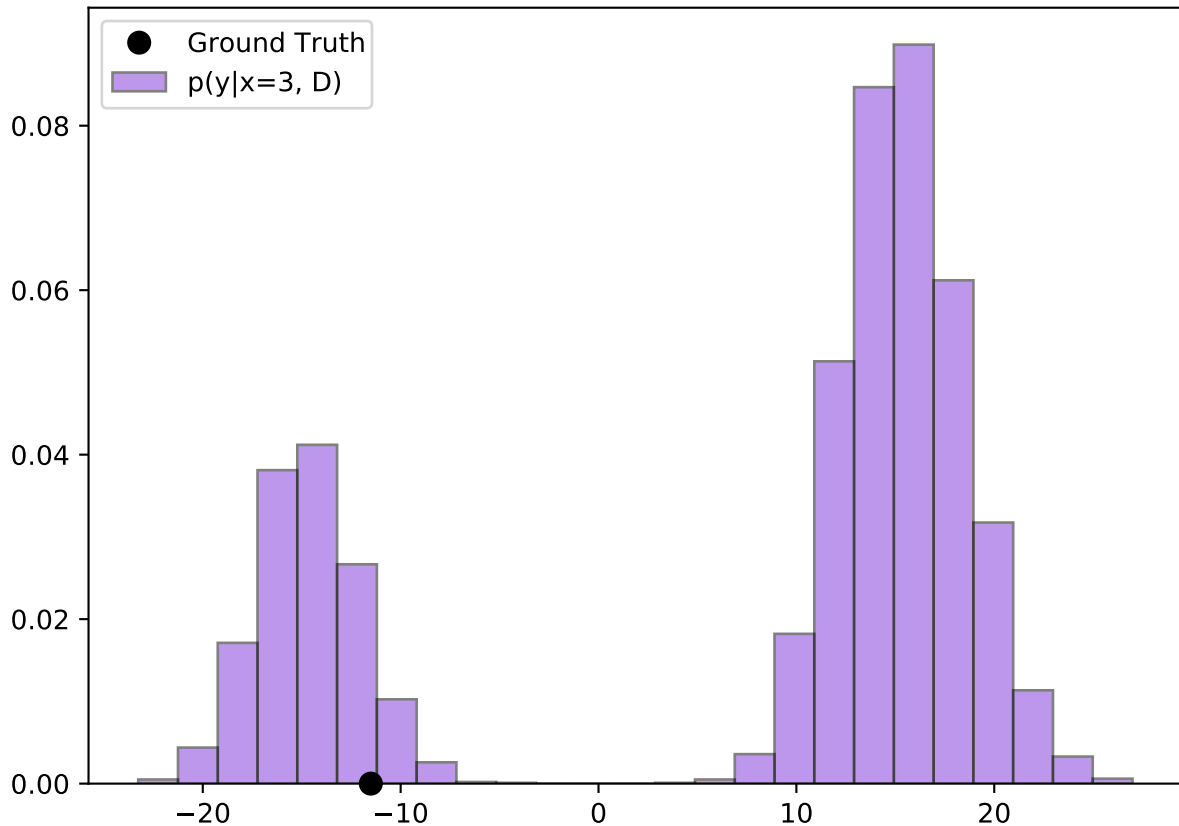

Supplement: supplementary_material [file attachment]

Train\_1 with Kurtosis = 3.10

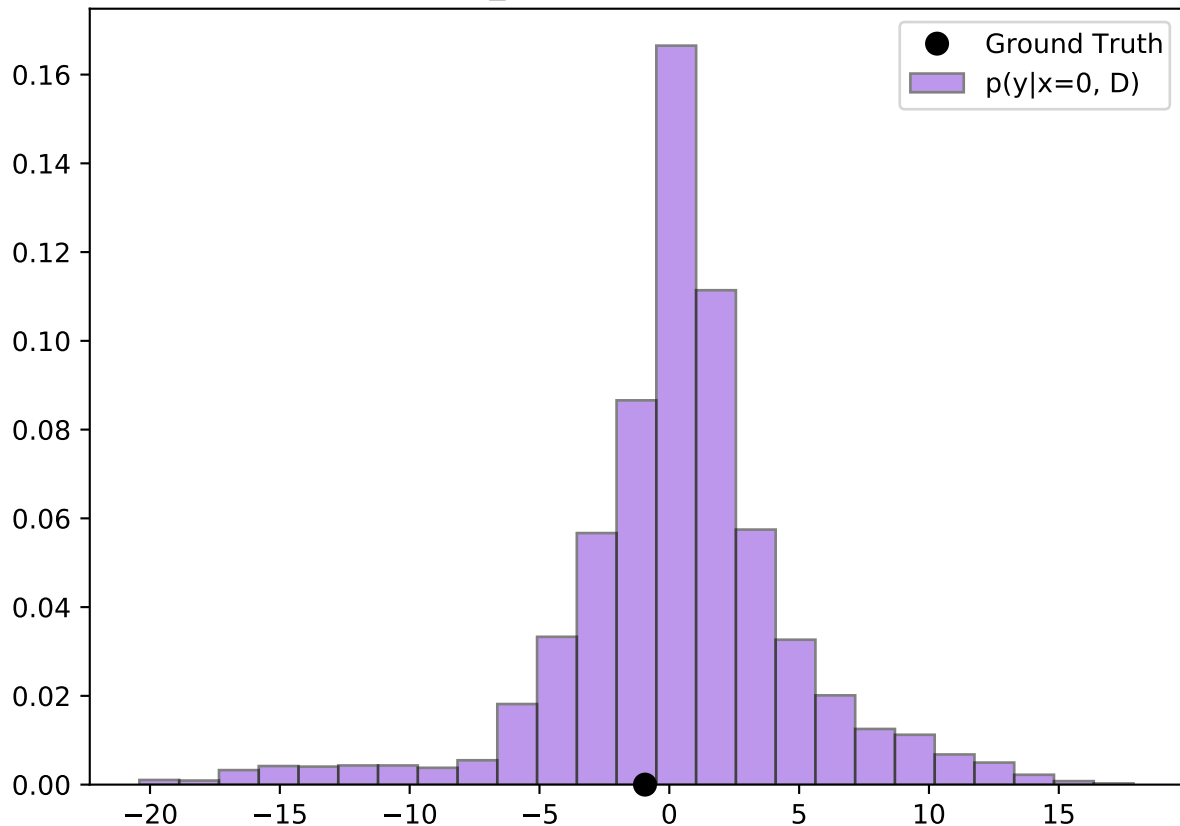

Supplement: supplementary_material [file attachment]

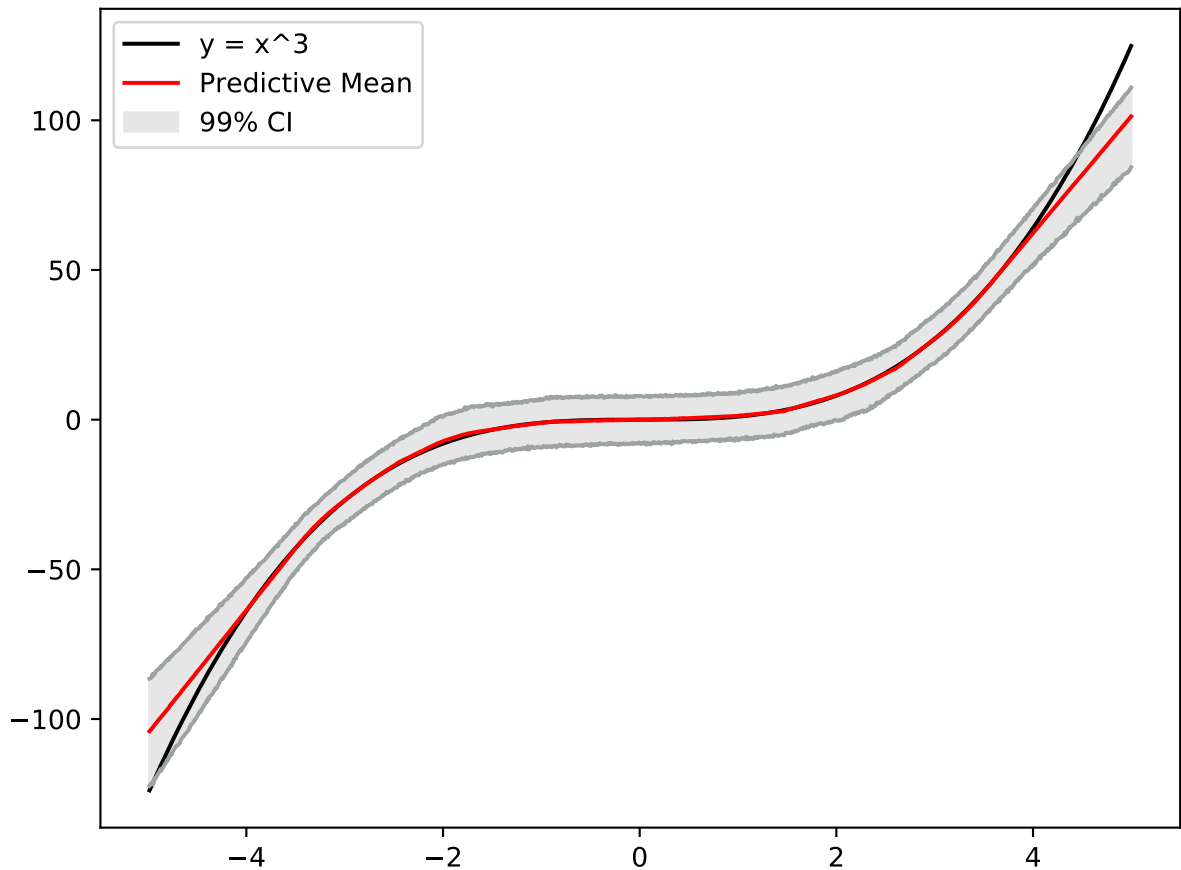

Supplement: supplementary_material [file attachment]

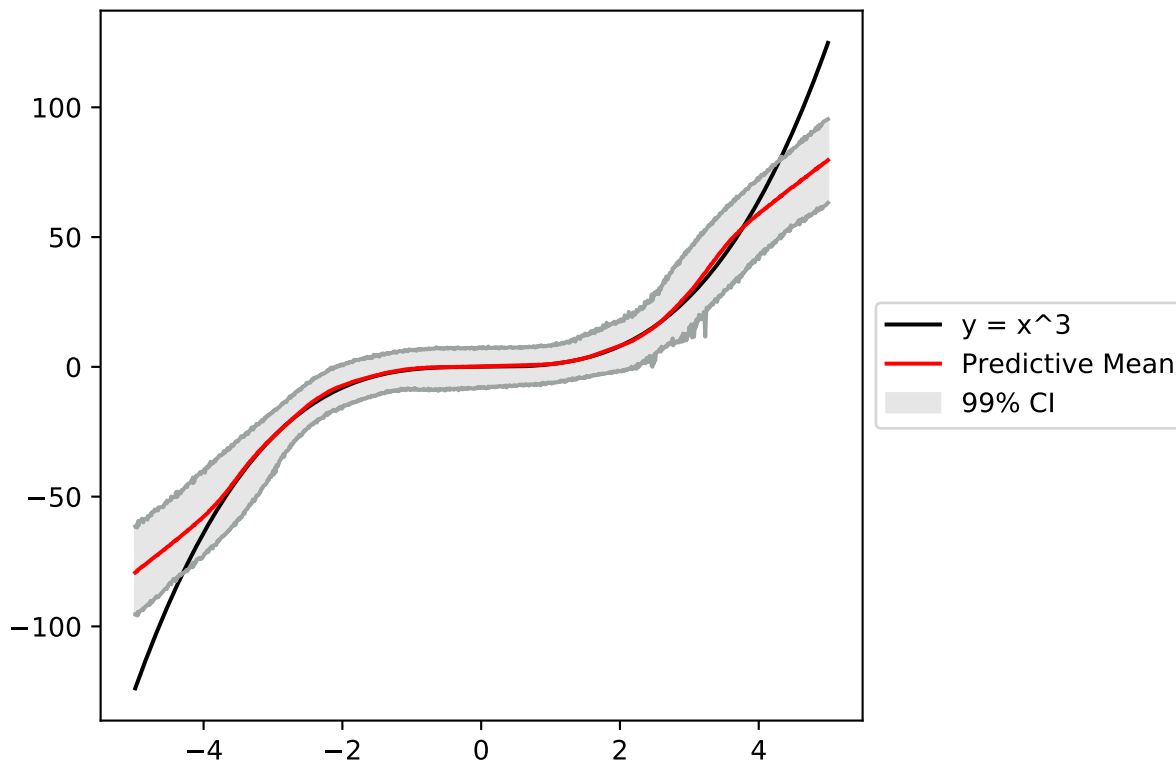

Supplement: supplementary_material [file attachment]

Train\_1 with Kurtosis = 0.01

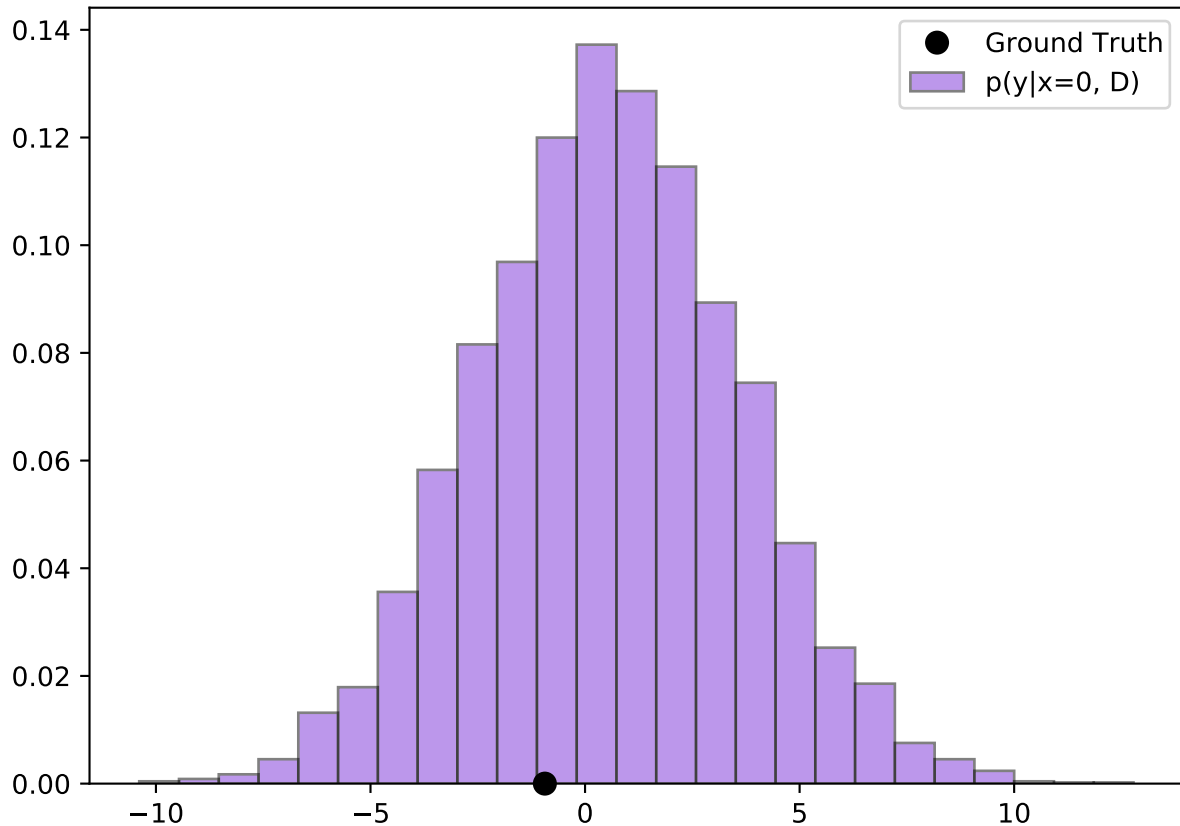

Supplement: supplementary_material [file attachment]

Train\_2 with Kurtosis = -1.04

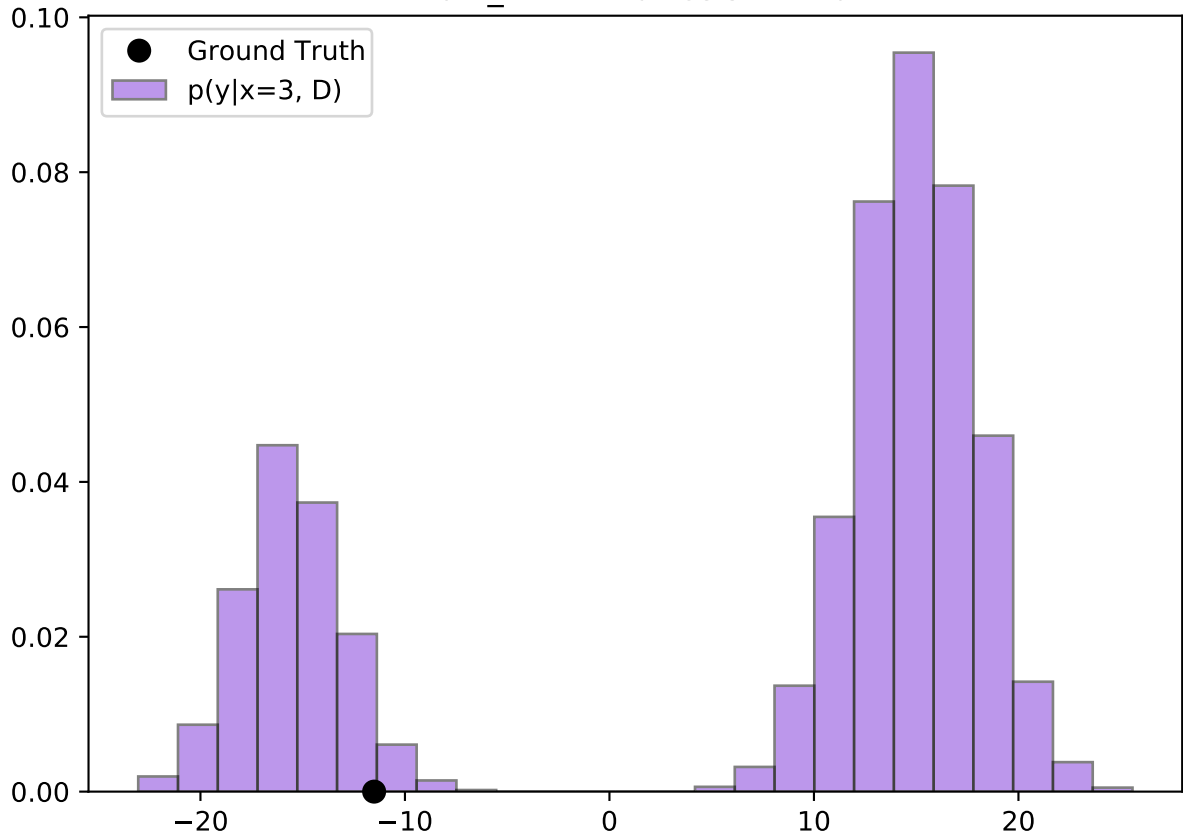

Supplement: supplementary_material [file attachment]

Train with Kurtosis = 0.79

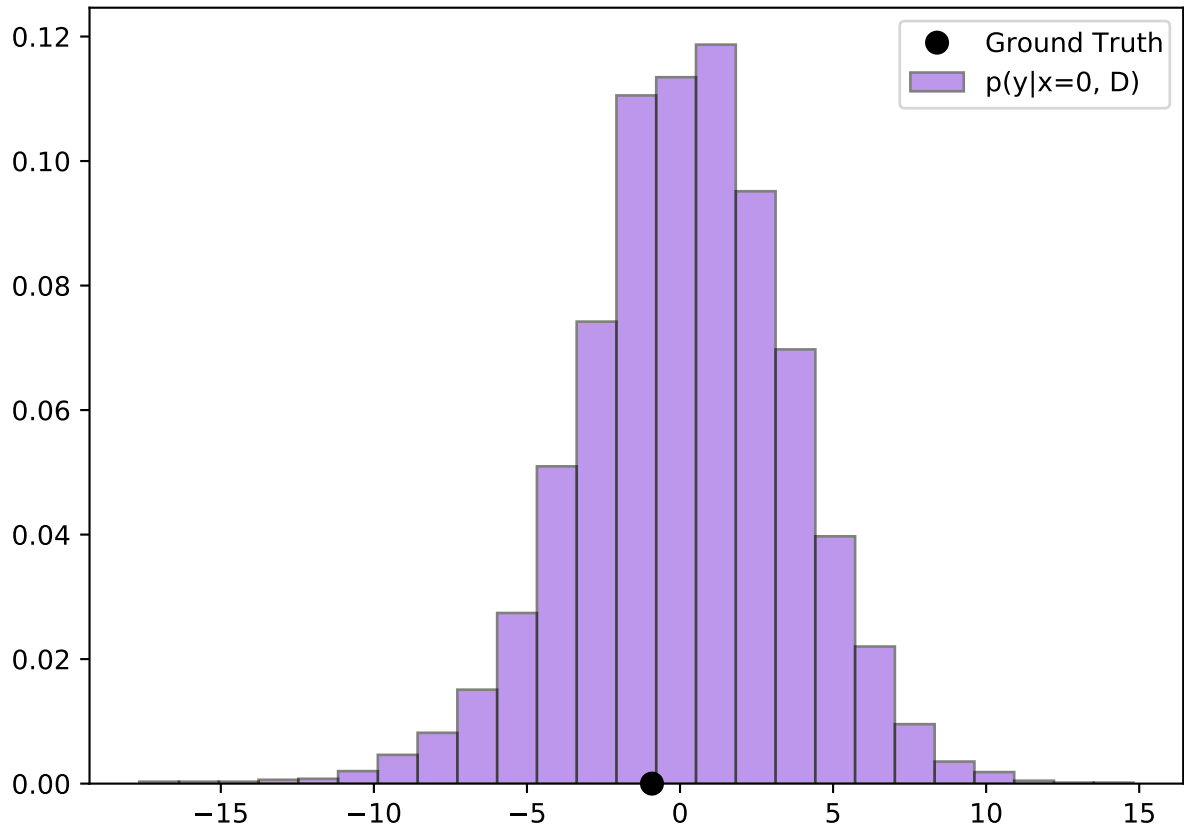

Supplement: supplementary_material [file attachment]

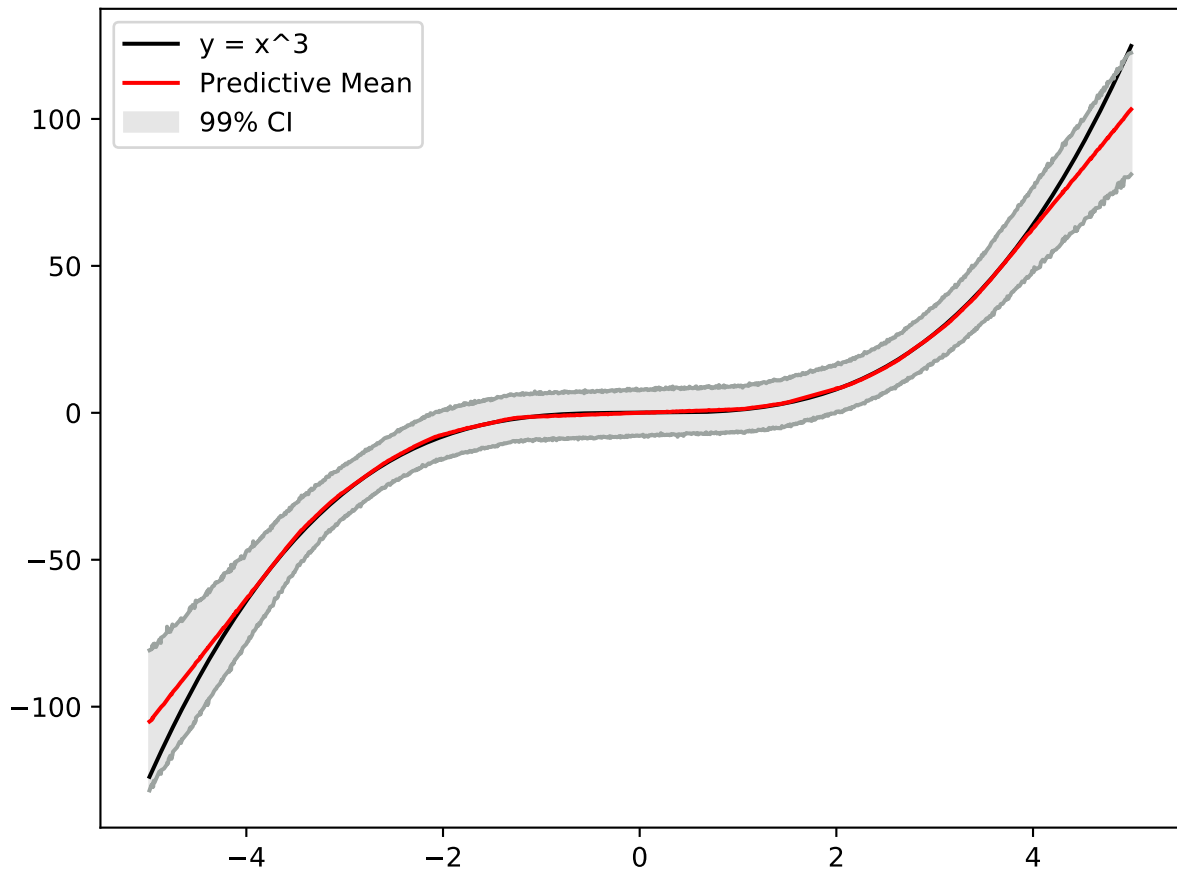

Supplement: supplementary_material [file attachment]

Test with Kurtosis = 0.45

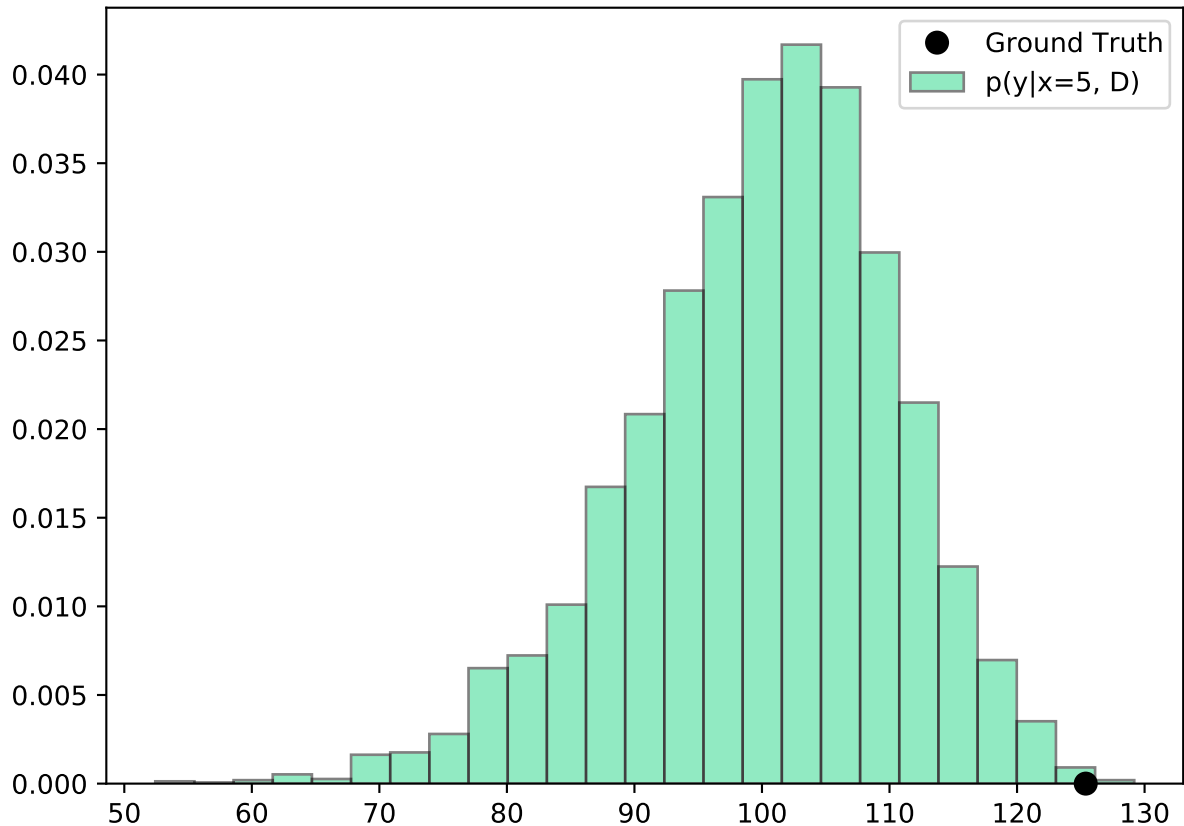

Supplement: supplementary_material [file attachment]

Train with Kurtosis = 0.58

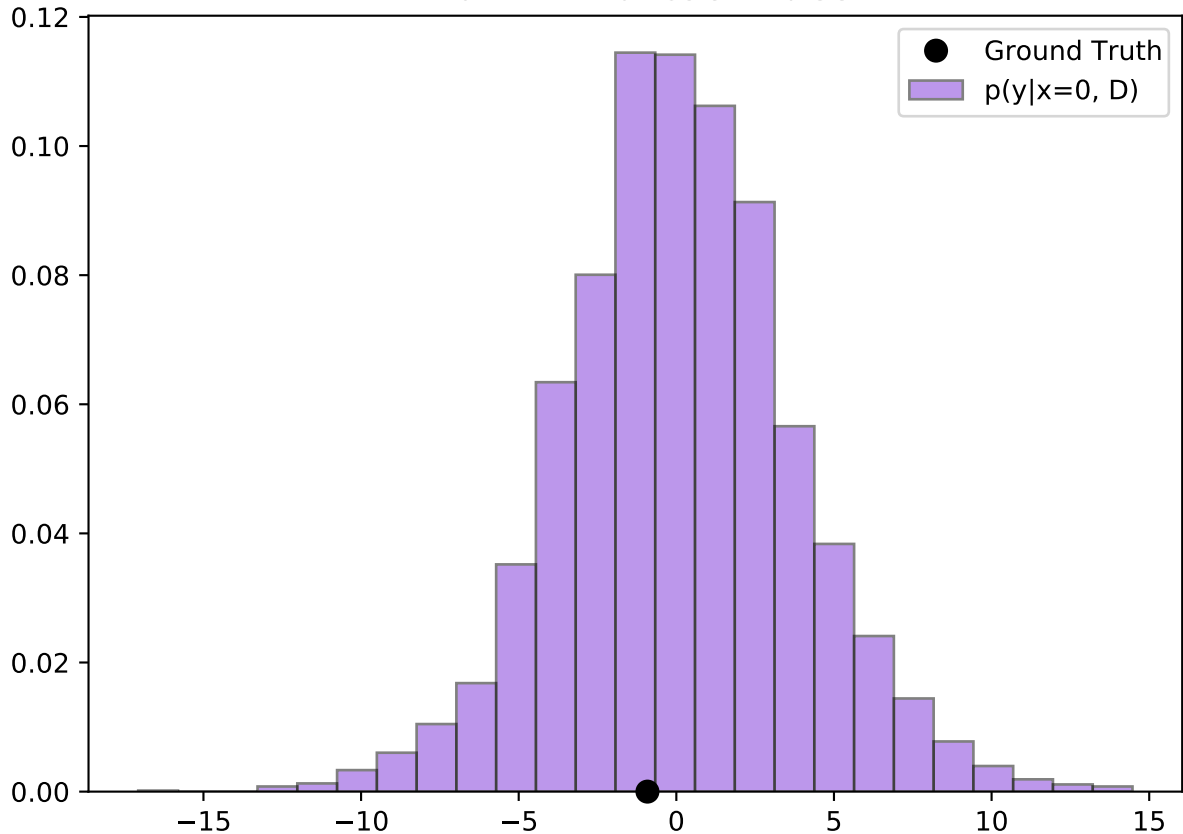

Supplement: supplementary_material [file attachment]

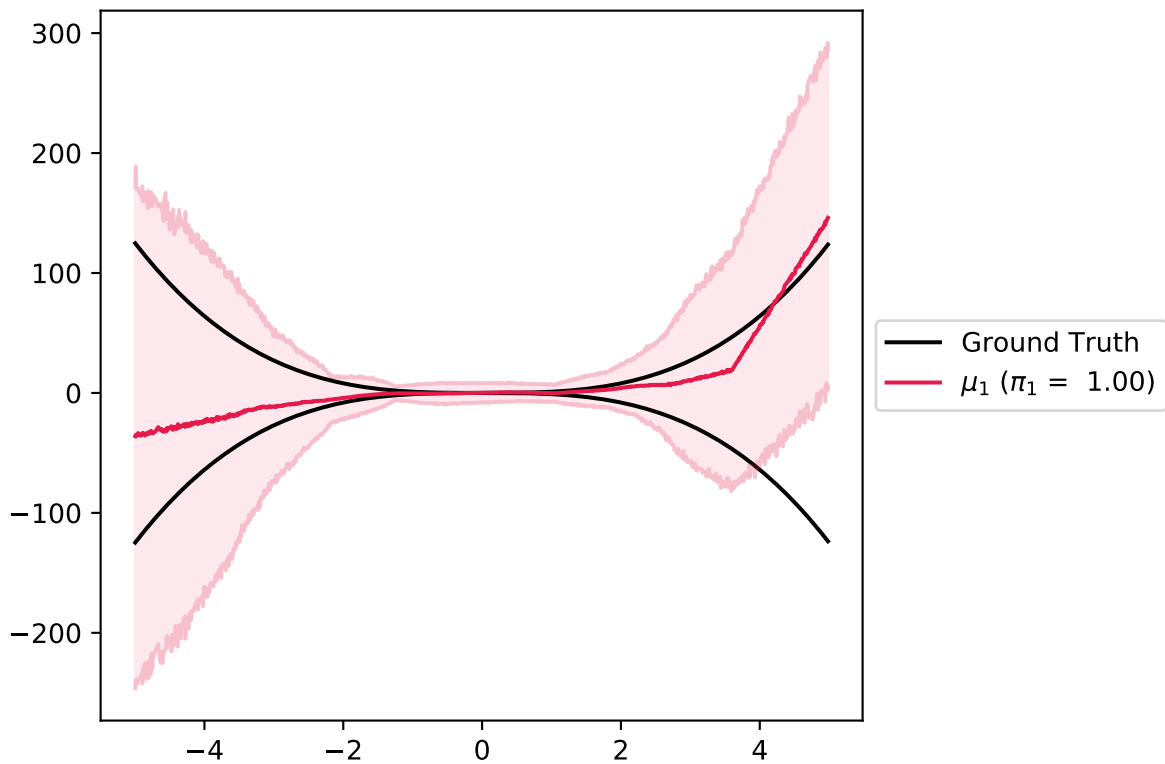

Supplement: supplementary_material [file attachment]

Train with Kurtosis = 0.71

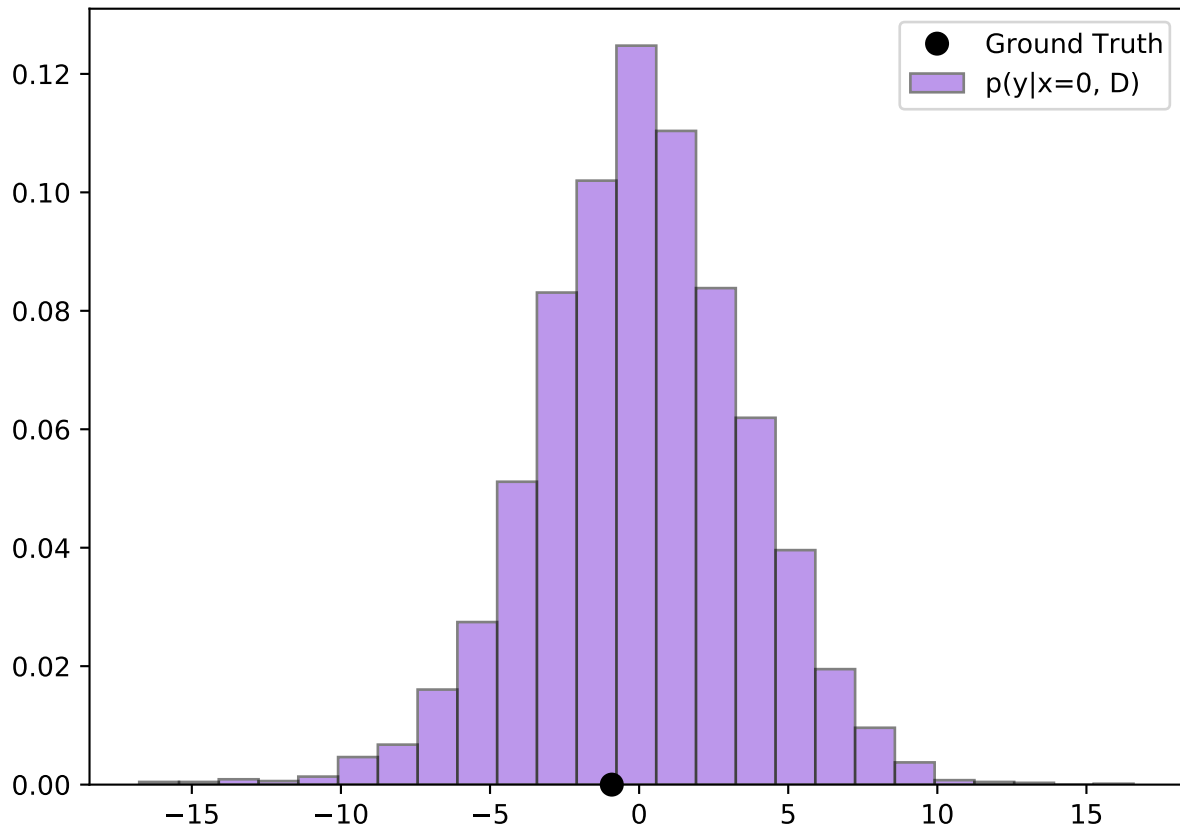

Supplement: supplementary_material [file attachment]

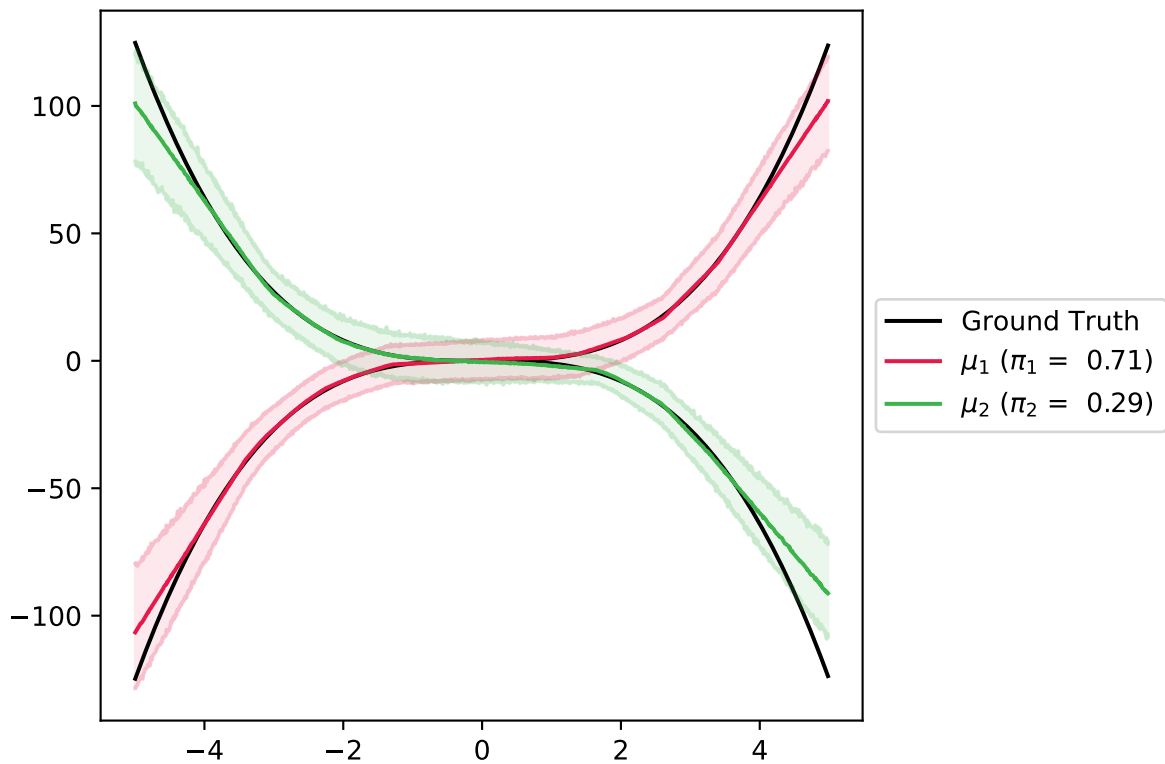

Supplement: supplementary_material [file attachment]

Train\_2 with Kurtosis = 0.07

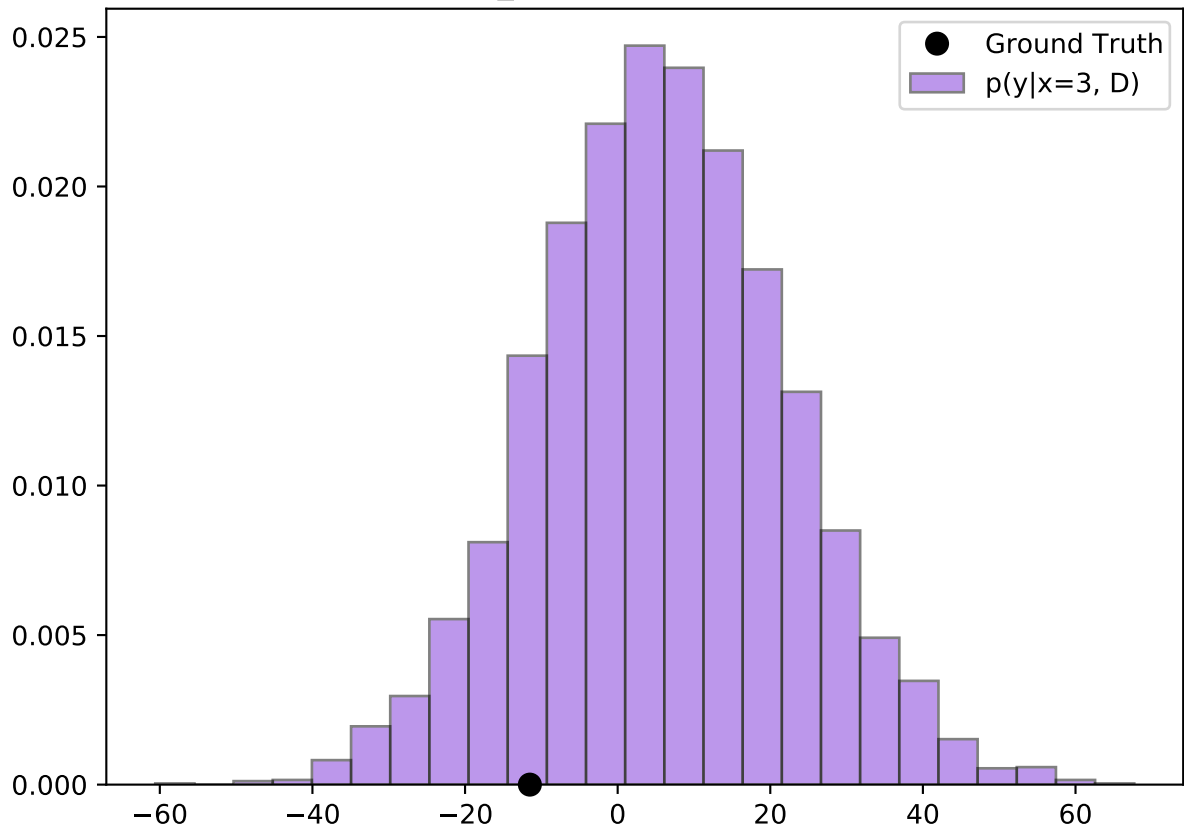

Supplement: supplementary_material [file attachment]

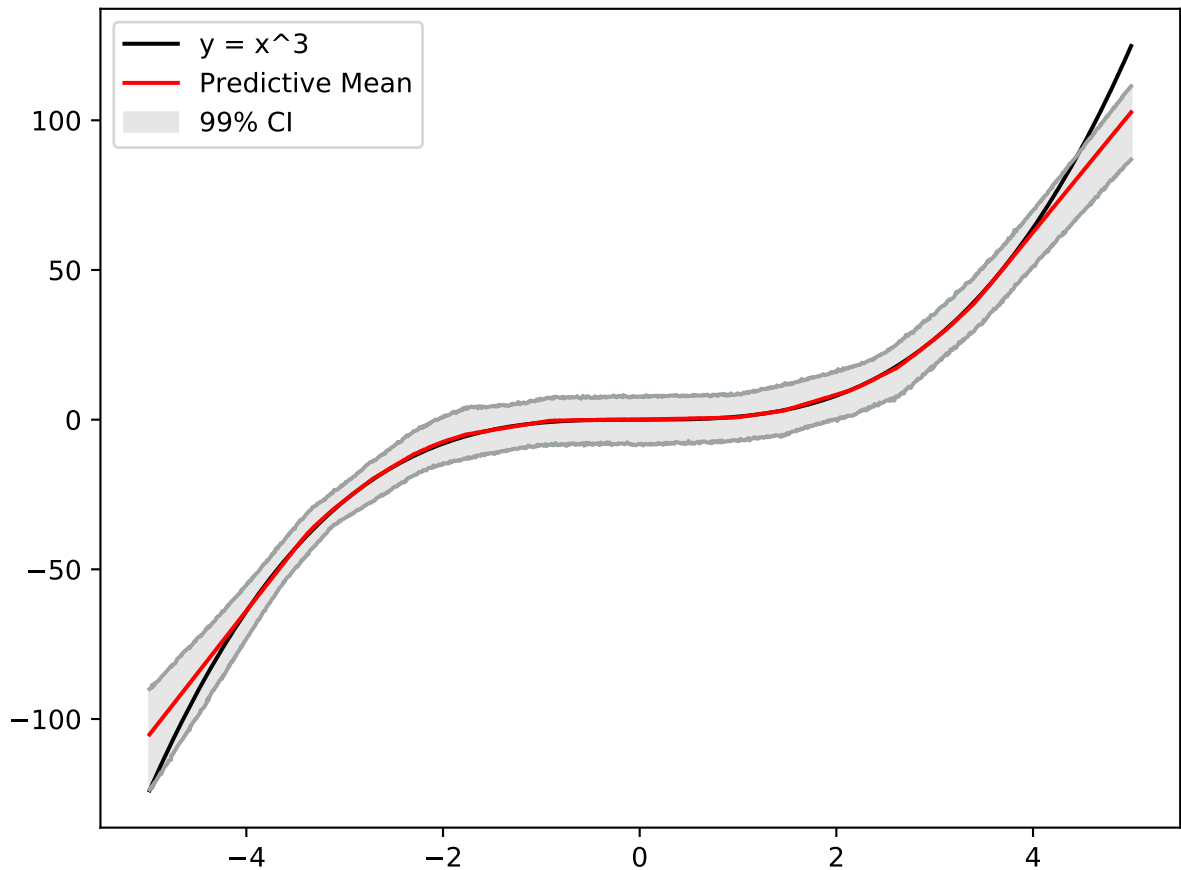

Supplement: supplementary_material [file attachment]

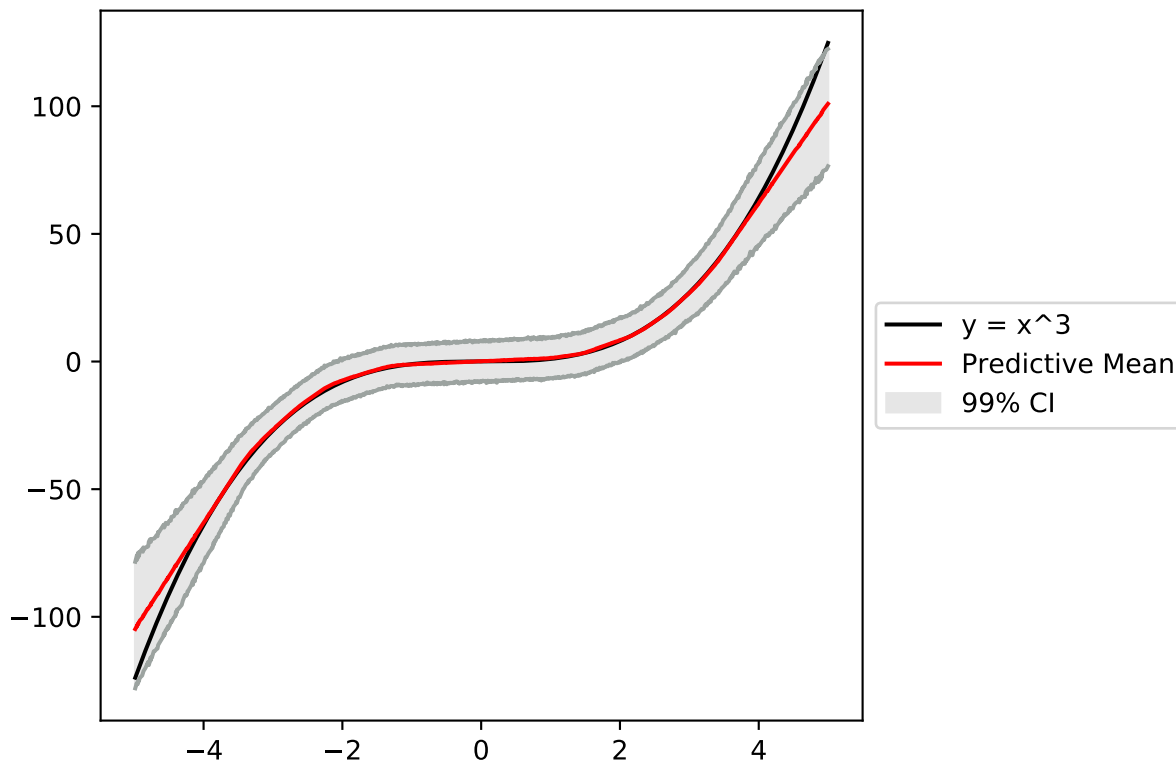

Supplement: supplementary_material [file attachment]

Train\_2 with Kurtosis = -0.06

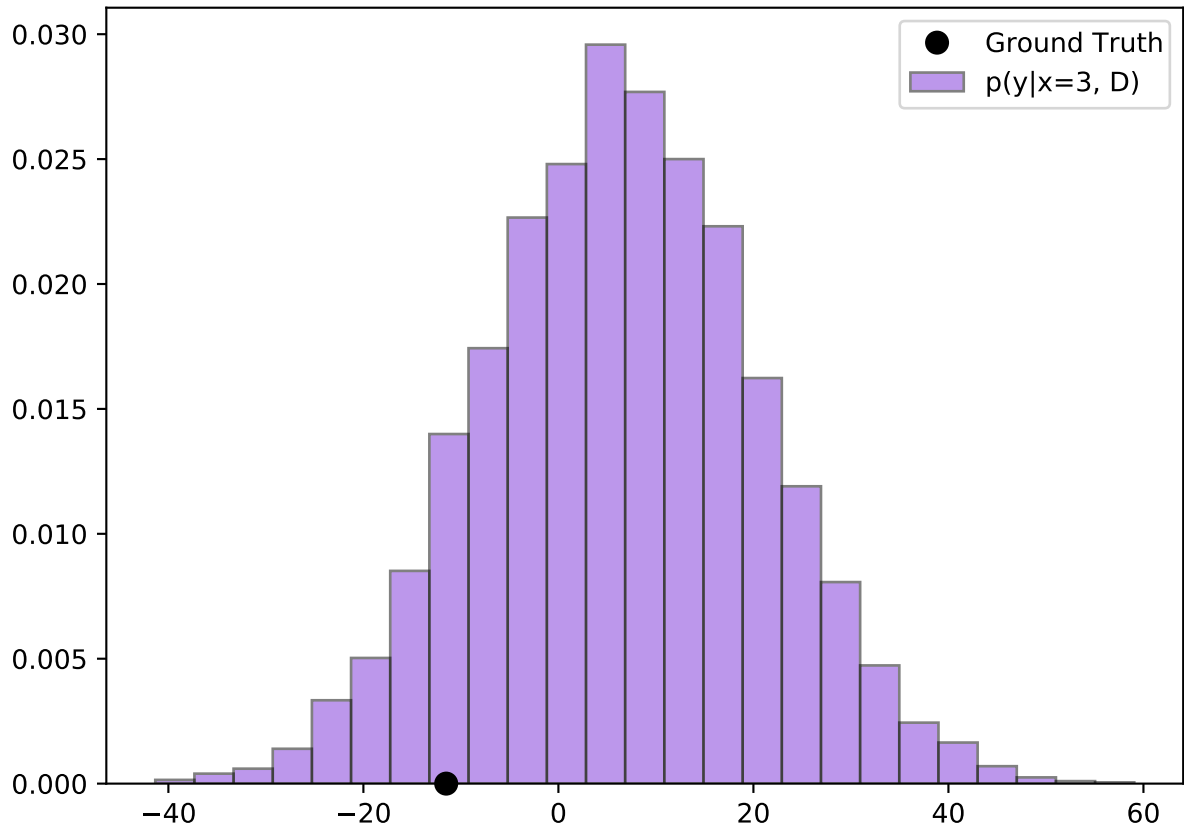

Supplement: supplementary_material [file attachment]

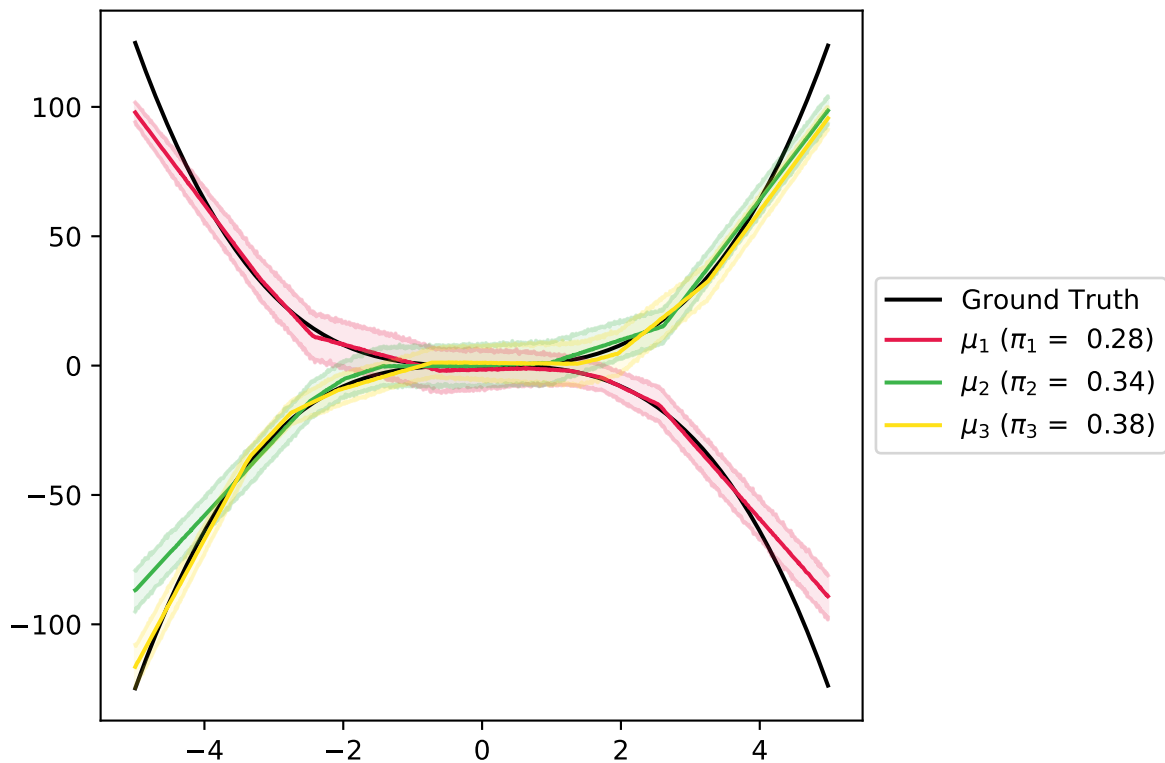

Supplement: supplementary_material [file attachment]

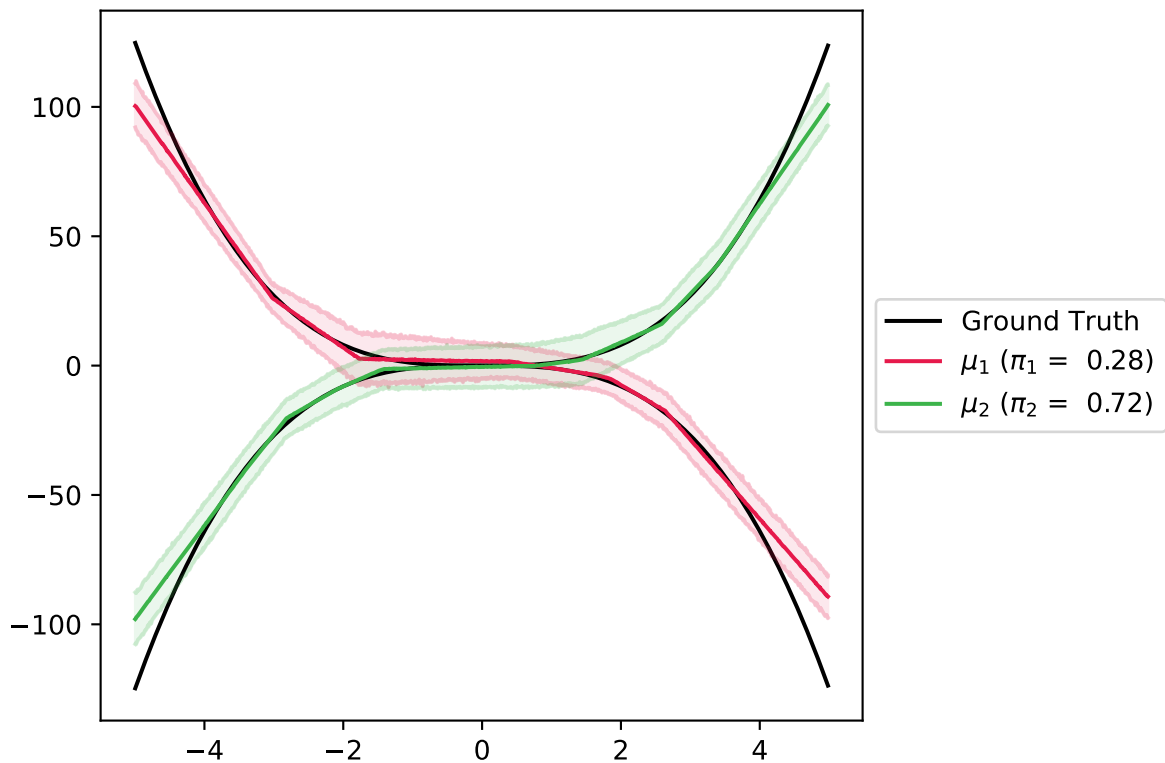

Supplement: supplementary_material [file attachment]

Train\_2 with Kurtosis = -0.95

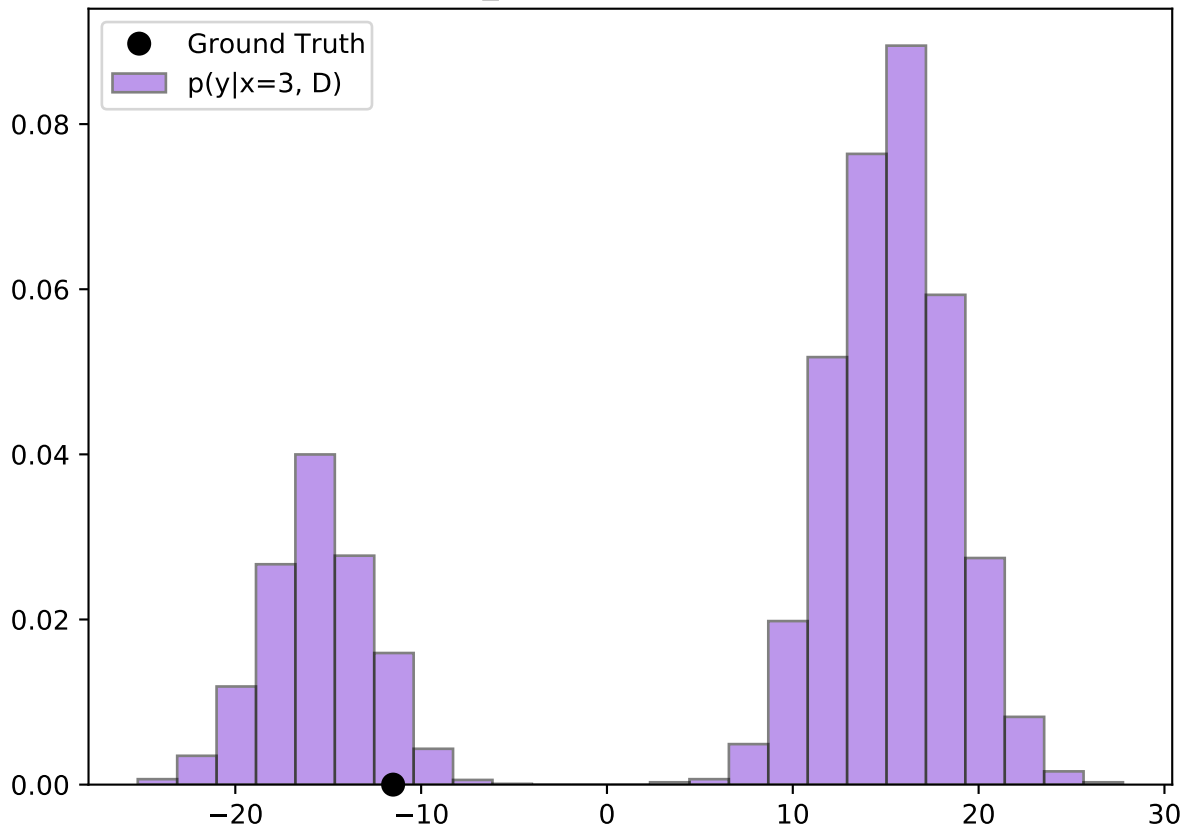

Supplement: supplementary_material [file attachment]

Train with Kurtosis = 0.07

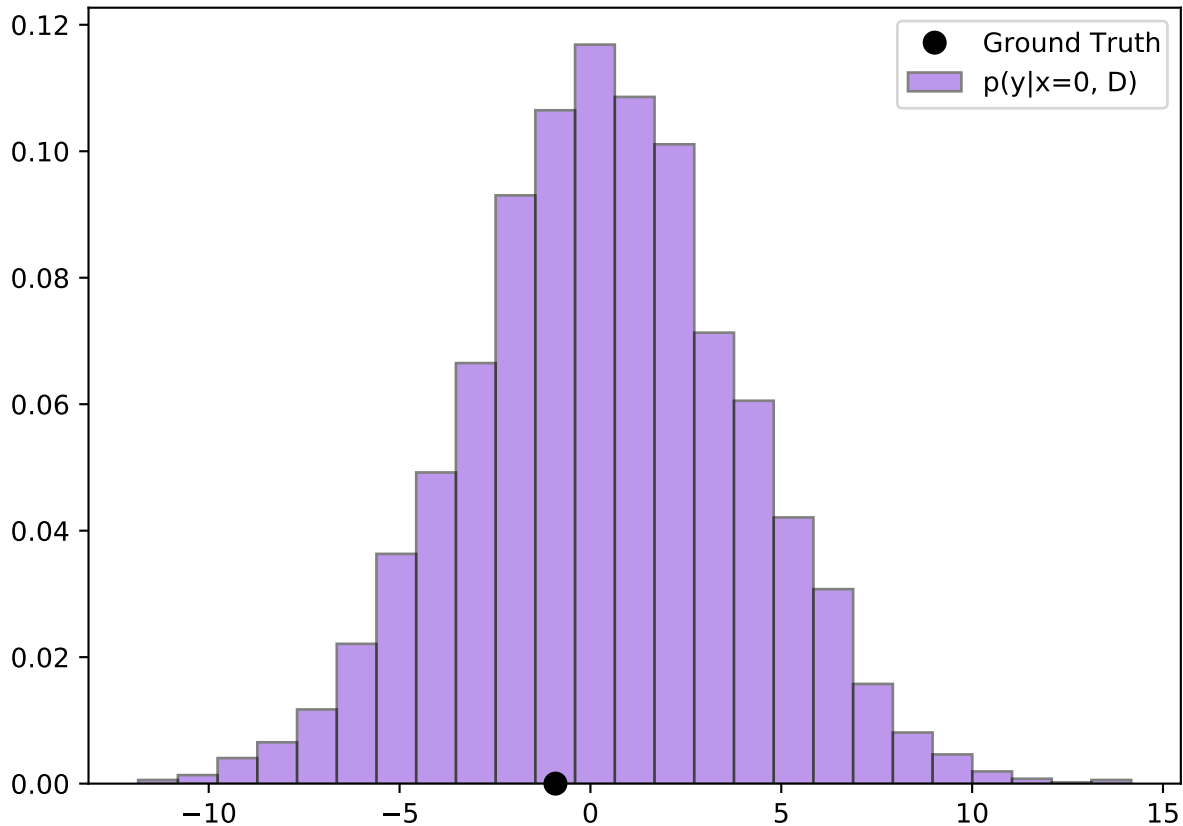

Supplement: supplementary_material [file attachment]

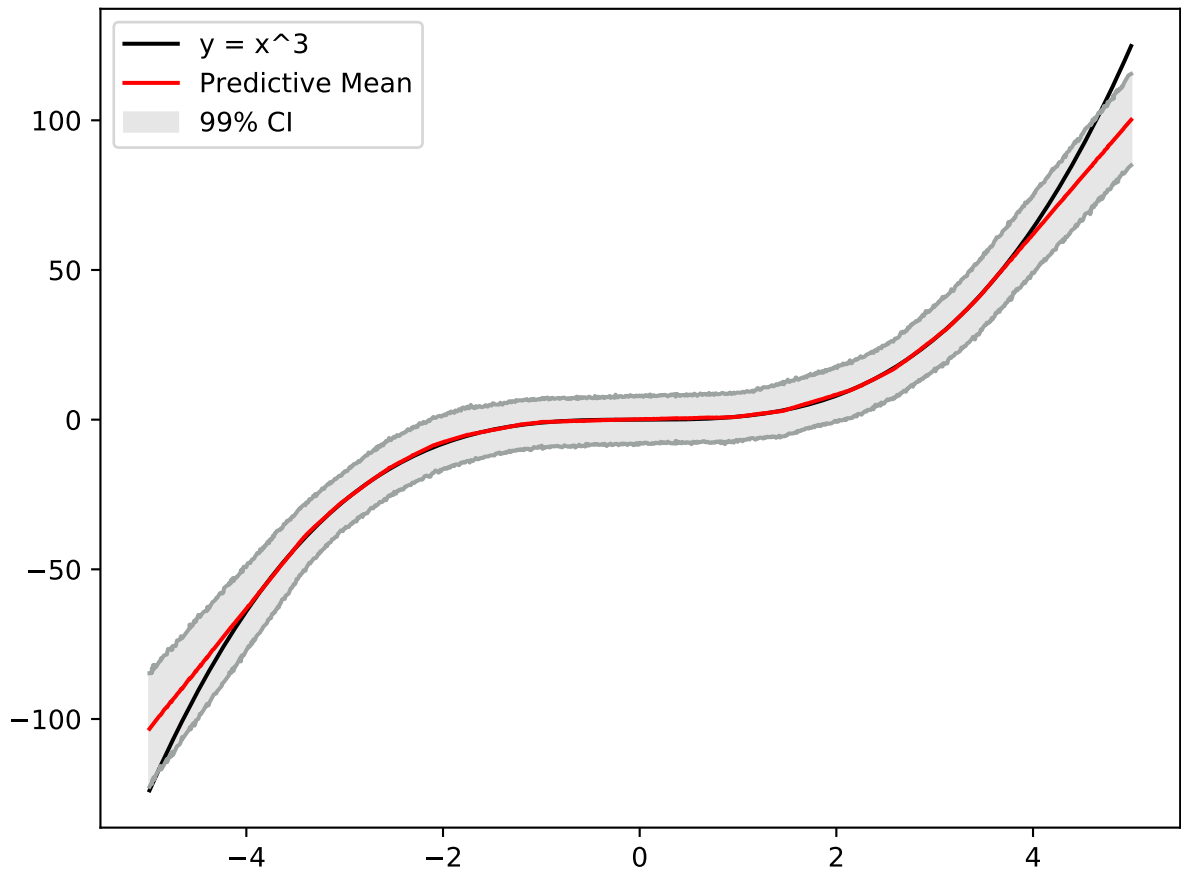

Supplement: supplementary_material [file attachment]
